# Supplementary material for: Bacterial and fungal communities respond differently to varying tillage depth in agricultural soils
Source: PeerJ. 2017 Oct 17;5:e3930. doi: 10.7717/peerj.3930 (PMC5649590; doi:10.7717/peerj.3930)
Supplement: Supplemental Information 2 — Relative abundances of fungal operational taxonomic units in samples based on DNA sequence length of fungal intergenic spacer regions (between fungal 18S rRNA and large ribosomal genes). [file peerj-05-3930-s002.xlsx]

## Sheet: Sheet1
	4_1	4_2	4_3	4_4	4_5	4_6	5_1	5_2	5_3	5_4	5_5	5_6	6_1	6_2	6_3	6_4	6_5	12_1	12_2	12_3	12_4	12_5	12_6	14_1	14_2	14_3	14_4	14_5	14_6	15_1	15_2	15_3	15_4	15_5	15_6	21_1	21_2	21_3	21_4	21_5	21_6	23_1	23_2	23_3	23_4	23_5	23_6	27_1	27_2
102.3	0	0	0	0	0	0	0	0	0	0	0.27	0	0	0	0	0	0	0	0	0	0	0	0	0	0	0	0	0	0	0	0	0	0	0	0	0	0	0	0	0	0	0	0	0	0	0	0	0	0
234.3	0	0	0	0	0	0	0	0	0	0	0	0	0	0	0	0	0	0	0	0	0	0	0	0	0	0	0	0	0	0	0	0	0	0	0	0	0	0	0	0	0	0	0	0	0	0	0	0	0
238.3	0	0	0	0	0	0.58	0	0	0	0	0	0	0	0	0	0	0	0	0	0	0	0	0	0	0	0	0	0	0	0	0	0	0	0	0	0	0	0	0	0	0	0	0	0	0	0	0	0	0
258.3	0	0	0	0	0	0	0	0	0	0	0	0	0	0	0	0	0	0	0	0	0	0	0	0	0	0	0	0	0	0	0	0	0	0	0	0	0	0	0	0	0	0	0.53	0	0	0	0	0	0
264.3	0	0	0	0	0	0	0	0	0.86	0	0	0	0	0	0	0	0	0	0	0	0	0	0	0	0	0	0	0	0	0	0	0	0	0	0	0	0	0	0	0	0	0	0	0	0	0	0	0	0
266.3	0	0	0	0	0	0	0	0	0	0	0	0	0	0	0	0	0	0	0	0	0	0	0	0	0	0	0	0	0	0	0	0	0	0	0	0	0	0	0	0	0	0	0	0	0	0	0	0	0
270.3	0	0	0	0	0	1.51	0	0	1.03	0	0	0	0	0	0	0	0	0	0	0	0	0	0	0	0	0	0	0	0	0	0	0	0	0	0	0	0	0	0	0	0	0	0	0	0	0	0	0	0
274.3	0	0	0	0	0	0	0	0	0	0	0	0	0	0	0	0	0	0	0	0	0	0	0	0	0	0	0	0	0	0	0	0	0	0	0	0	0	0	0	0	0	0	0	0	0	0	0	0	0
276.3	1.11	0	0	0	0	0	0	0	1.26	0	0	0	0	0	0	0	0	0	0	0	0	0	0	0	0	0	0	0	0	0	0	0	0	0	0	0	0	0	0	0	0	0	0	0	0	0	0	0	0
280.3	0	0	0	0	0	0	0	0	0.99	0	0	0	0	0	0	0	0	0	0	0	0	0	0	0	0	0	0	0	0	0	0	0	0	0	0	0	0	0	0	0	0	0	0	0	0	0	0	0	0
282.3	0.85	1.74	0	0	1.52	0.92	0	0	0	0	0	0	0	0	0	0	0	0	0	0	0	0	0	0	0	0	0	0	0	0	0	0	0	0	0	0	0	0	0	0	0	1.22	0.97	0	0.92	0	1.08	0	0
284.3	0	0	0	0	0	0	0	0	0	0	0	0	0	0	0	0	0	0	0	0	0	0	0	0	0	0	0	0	0	0	0	0	0	0	0	0	0	0	0	0	0	0	0	0	0	0	0	0	0
286.3	0	0	0	0	0	0	0	0	0.62	0	0	0	0	0	0	0	0	0	0	0	0	0	0	0	0	0	0	0	0	0	0	0	0	0	0	0	0	0	0	0	0	0	0	0	0	0	0	0	0
290.3	0	0	0	0	0	0	0	0	1.26	0	0	0	0	0	0	0	0	0	0	0	0	0	0	0	0	0	0	0	0	0	0	0	0	0	0	0	0	0	0	0	0	0	0	0	0	0	0	0	0
294.3	0	0	0	0	0	0	0	0	0	0	0	0	0	0	0	0	0	0	0	0	0	0	0	0	0	0	0	0	0	0	0	0	0	0	0	0	0	0	0	0	0	0	0	0	0	0	0	0	0
296.3	0	0	0	0	0	0	0	0	0.66	0	0	0	0	0	0	0	0	0	0	0	0	0	0	0	0	0	0	0	0	0	0	0	0	0	0	0	0	0	0	0	0.68	0	0	0	0	0	0	0	0
298.3	0	0	0	0	0	0.7	0.57	0	0	0	0.27	0	0	0	0	0	0	0	0	0	0	0	0	0	0	0	0	0	0	0	0	0	0	0	0	0	0	0	0	0	0	0	0	0	0	0	0	0	0
300.3	0	0	0	0	0	0	0	0	0	0	0	0	0	0	0	0	0	0	0	0	0	0	0	0	0	0	0	0	0	0	0	0	0	0	0	0	0	0	0	0	0	0	0	0	0	0	0	0	0
302.3	0	0	0	0	0	0	0	0	1.2	0	0	0	0	0	0	0	0	0	0	0	0	0	0	0	0	0	0	0	0	0	0	0	0	0	0	0	0	0	0	0	0	0	0	0	0	0	0	0	0
304.3	0	0	0	0	0	0	0	0	0.58	0	0	0	0	0	0	0	0	0	0	0	0	0	0	0	0	0	0	0	0	0	0	0	0	0	0	0	0	0	0	0	0	0	0	0	0	0	0	0	0
314.3	0	0	0	0	0	0	0	0	0.88	0	0	0	0	0	0	0	0	0	0	0	0	0	0	0	0	0	0	0	0	0	0	0	0	0	0	0	0	0	0	0	0	0	0	0	0	0	0	0	0
324.3	0	0	0	0	0	0	0.79	0	0	0	0	0	0	0	0	0	0	0	0	0	0	0	0	0	0	0	0	0	0	0	0	0	0	0	0	0	0	0	0	0	0	0	0	0	0	0	0	0	0
344.3	0	0	0	0	0	0	0	0	0	0	0	0	0	0	0	0	0	0	0	0	0	0	0	0	0	0	0	0	0	0	0	0	0	0	0	0	0	0	0	0	0	0	0	0	0	0	0	0	0
348.3	0	0	0	0	0	0	0	0	0	0	0	0	0	0	0	0	0	0	0	0	0	0	0	0	0	0	0	0	0	0	0	0	0	0	0	0	0	0	0	0	0	0	0	0	0	0	0	0	0
352.3	0	0	0	0	0	0	0	0	0	0	0	0	0	0	0	0	0	0	0	0	0	0	0	0	0	0	0	0	0	0	0	0	0	0	0	0	0	0	0	0	0	0	0	0	0	0	0	0	0
354.3	0	0	0	0	0	0	0	0	0	0	0.39	0	0	0	0	0	0	0	0	0	0	0	0	0	0	0	0	0	0	0	0	0	0	0	0	0	0	0	0	0	0	0	0	0	0	0	0	0	0
356.3	0	0	0	0	0	0	0	0	0	0	0	0	0	0	0	0	0	0	0	0	0	0	0	0	0	0	0	0	0	0	0	0	0	0	0	0	0	0	0	0	0	0	0	0	0	0	0	0	0
372.3	0	0	0	0	0	0	0	0	0	0	0	0	0	0	0	0	0	0	0	0	0	0	0	0	0	0	0	0	0	0	0	0	0	0	0	0	0	0	0	0	0	0	0	0	0	0	0	0	0
518.3	0	0	0	0	0	0	0	0	0	0	0	0	0	0	0	0	0	0	0	0	0	0	0	0	0	0	0	0	0	0	0	0	0	0	0	0	0	0	0	0	0	0	0	0	0	0	0	0	0
520.3	0	0	0	0	0	0	0	0	0	0	0	0	0	4.92	0	0	0	0	0	0	0	0	0	0	0	0	0	0	0	0	0	0	0	0	0	0	0	0	0	0	0	0	0	0	0	0	0	0	0
530.3	0	0	0	0	0	0	0	0	0	0	0	0	0	0	0	0	0	0	0	0	0	0	0	0	0	0	0	0	0	0	0	0	0	0	0	0	0	0	0	0	0	1.93	0	0	0	0	0	0	0
566.3	0	0	0	0	0	0	0	0	0	0	0	0	0	0	0	0	0	0	0	0	0	0	0	0	0	0	0	0	0	0	0	0	0	0	0	0	0	0	0	0.58	0	0	0	0	0	0	0	0	0
590.3	0	0	0	0	0	0	0	0	0	0	0	0	0	0	0	0	0	0	0	1.29	0	0	0	0	0	0	0	0	0	0	0	0	0	0	0	0	0	0	0	0	0	0	0	0	0	0	0	0	0
592.3	0	0	0	0	0	0	0	0	0	0	0	0	0	0	0	0	0	0	0	0	0	0	0	0	0	0	0	0	0	0	0	0	0	0	0	0	0	0	0	0	0	0	0	0	0	0	0	0	0
594.3	0	0	0	0	0	0	0	0	0	0	0.32	0	0	0	0	0	0	0	0	0	0	0	0	0	0	0	0	0	0	0	0	0	0	0	0	0	0	0	0	0	0	0	0	0	0	0	0	0	0
600.3	0	0	0	0	0	0	0	0	0	0	0	0	0	0	0	0	0	0	0	0	0	0	0	3.93	0	0	0	0	0	0	0	0	0	0	0	0	0	0	0	0.93	0	0	0	0	0	0	0	0	0
608.3	0	0	0	0	0	0	0	0	0	0	0	0	0	0	0	0	0	0	0	0	0	0	0	0	0	0	0	0	0	0	0	0	0	0	0	0	0	0	0	0	0	0	0	0	0	0	0	0	0
610.3	0	0	0	0	0	0	0	0	0	0	0.57	0	0	0	0	0	0	0	0	0	0	0	0	0	0	0	0	0	0	0	0	0	0	0	0	0	0	0	0	0	0	0	0	0	0	0	0	0	0
614.3	0	0	0	0	0	0	0	0	0	0	0	0	0	0	0	0	0	0	0	0	0	0	0	0	0	0	0	0	0	0	0	0	0	0	0	0	0	0	0	0	0	0	0	0	0	0	0	0	0
618.3	0	0	0	0	0	0	0	0	0	0	0	0	0	0	0	0	0	0	0	0	0	0	0	0	0	0	0	0	0	0	0	0	0	0	0	0	0	0	0	0	0	0	0	0	0	0	0	0	0
620.3	0	0	0	0	0	0	0	0	0	0	0	0	0	0	0	0	0	0	0	0	0	0	0	0	0	0	0	0	0	0	0	0	0	0	0	0	0	0	0	0	0	0	0	0	0	0	0	0	0
624.3	0	0	0	0	0	0	0	0	0	0	0	0	0	0	0	0	0	0	0	0	0	0	0	0	0	0	0	0	0	0	0	0	0	0	0	0	0	0	0	0	0	0	0	0	0	0	0	0	0
626.3	0	0	0	0	0	0.6	0	0	0	0	0	0	0	0	0	0	0	0	0	1.67	0	0	18.44	2.42	0	0	0	0	0	0	0	5.89	0	31.32	0	3.62	2.47	0	8.8	3.69	1.37	0	0	0	0	0	0	3.59	0
630.3	0	0	0	0	0	0	0	0	0	0	0	0	0	0	0	0	0	0	0	0	0	0	0	0	0	0	0	0	9.37	0	0	0	0	0	0	0	1.46	0	0	0.79	0	0	0	0	0	0	0	0	0
632.3	0	0	0	0	0	0	2.16	0	0	0	0	0	0	0	0	0	0	0	0	0	0	0	0	0	0	0	0	0	0	0	0	0	0	0	0	0	0	0	0	0	0	0	0	0	0	0	0	0	0
634.3	0	0	0	0	0	0	0	0	0	0	0.49	0	0	3.93	0	0	0	0	0	0	0	0	14.7	0	0	0	0	0	0	0	0	0	0	0	0	0	3.36	0	0	1.25	0	0	0	0	5.19	0	0	0	0
636.3	0	0	0	0	0	0	0	0	0	0	0.62	0	0	0	0	0	0	0	0	0	0	0	0	0	0	0	0	0	0	0	0	0	0	0	0	0	0	0	0	0	0	0	0	0	0	0	0	0	0
638.3	1.86	3.21	2.84	0	1.99	1.76	0	0	0	1.77	0	0	0	0	23.41	0	0	0	0	0	0	0	0	6.49	0	0	2.83	3.23	9.62	0	0	0	0	11.44	0	0	0	0	0	2.32	0	1.4	3.46	15.66	2.45	0	1.23	0	0
640.3	0	0	0	0	0	0	0	0	0	0	0	0	0	0	0	0	0	0	0	0	0	0	0	0	0	0	0	0	0	0	0	0	0	0	0	0	0	0	0	0	0	0	0	0	0	0	0	0	0
642.3	0	0	0	0	0	0	0	0	9.95	7.19	17.2	0	0	0	0	0	0	0	0	0	0	0	0	0	0	0	0	0	0	0	0	0	0	0	0	0	0	0	0	0	0	0	0	39.45	0	0	0	0	0
644.3	0	0	0	0	0	0	2.75	11.12	2.49	0	10.47	16.46	0	0	25.05	0	0	0	0	0	0	0	0	0	0	0	0	0	0	0	0	0	0	0	0	0	0	0	0	0.82	0	0	0	0	0	0	0	16.01	0
646.3	2.23	6.51	14.54	6.18	10.11	8.97	2.91	2.81	0	3.88	0	8.87	0	8.26	0	15.38	28.59	0	18.42	0	0	0	0	10.28	21.01	4.71	5.3	6.18	0	0	0	4.38	0	0	0	0	2.06	0	0	0	0	2.76	5.04	0	3.62	2.94	1.89	0	34.45
648.3	14.1	0	0	29.19	0	25.73	1.74	9.28	1.8	0	1.61	0	0	0	0	9.22	0	7.55	0	0	0	0	6.87	0	0	0	49.36	0	53.08	0	0	0	100	18.86	0	3.65	24.91	21.12	34.7	8.03	18.11	0	0	3.65	0	0	2.42	0	0
650.3	0	0	0	0	0	0	0.65	0	0	0	0	0	0	0	0	0	0	0	0	0	0	0	0	0	0	0	0	0	0	0	0	0	0	0	0	0	0	0	0	0	0	0	0	0	0	0	0	0	0
652.3	0	0	0	0	0	0	0	0	0	1.54	0.43	0	0	0	0	0	0	0	0	0	0	0	3.96	0	0	0	4.66	0	0	0	0	6.42	0	0	0	1.92	3.17	0	2.52	0.67	0	0	3.4	0	0	2.45	0.96	3.96	0
654.3	1.12	0	0	0	0	1.03	0	3.94	0	0	0	3.68	0	0	0	0	0	0	0	0	0	0	0	0	0	0	0	31.37	0	0	31.13	0	0	0	0	0	0	0	0	0	0	0	0	0	0	0	0	0	0
656.3	3.3	3.27	3.68	4.45	0.91	2.61	43.8	0	1.27	1.24	12.23	0	0	0	0	22.97	0	0	0	0	0	100	5.62	4.68	33.08	14.26	8.55	8.96	2.1	0	0	0	0	0	0	0	0	0	0.88	3.76	0	2.04	1.93	0	3.3	0	0.78	0	0
658.3	11.07	19.48	19.62	18.12	9.9	9.85	0	0	0	0	0	0	23.23	0	0	0	0	0	0	9.62	0	0	0	12.69	12.08	0	2.76	17.26	2.82	0	0	0	0	0	0	0	3.64	0	2.3	0.85	0	5.94	41.01	8.61	27.83	7.19	9.67	0	0
660.3	0	0	0	0	0	0	0	0	2.03	0.99	0	0	0	0	0	0	0	0	0	0	0	0	0	0	0	0	0	0	0	0	0	0	0	0	0	0	0	0	0	0	0	0	0	3.31	0	0	0	0	0
662.3	24.73	9	0	0	9.24	4.55	0	0	0	0	2.34	0	0	0	0	0	0	17.04	10.6	0	0	0	0	1.51	0	0	11.36	4.05	0	0	0	9.57	0	0	0	30.68	6.9	0	6.66	12.27	13.96	2.15	5.61	0	14.09	0	1.15	0	0
664.3	1.51	0	0	0	0	0	1.49	0	0	0	0	0	0	0	0	0	0	0	0	0	0	0	0	0	0	0	0	0	0	0	0	0	0	0	0	0	0	0	1.64	0	0	5.54	0	0	2.61	0	1.82	0	0
666.3	0	0	9.16	0	0	0	0	0	0	0	0	2.88	0	0	0	0	0	0	9.33	0	0	0	0	0	0	0	0	0	0	0	0	0	0	0	0	0	0	0	0	0	0	0	0	7.77	0	0	0	0	0
668.3	0	0	0	0	0	0.63	0	0	0	0	0	2.74	0	0	0	0	0	0	0	0	0	0	0	0	0	0	0	0	0	0	0	0	0	0	0	0	0	0	1.55	0	0	0	0	0	0	1.64	0	0	0
670.3	0	0	0	0	0	0	0	0	1.06	0	1.97	0	0	0	14.45	0	0	0	0	0	0	0	0	0	0	0	0	0	0	0	0	0	0	0	0	0	0	0	0	0	0	0	0	0	0	0	0	0	0
672.3	0	0	0	0	1.17	0	0	8.88	0	0	0	0	0	0	0	0	0	0	0	4.7	0	0	0	25.09	3.04	6.25	0	0	0	0	0	0	0	22.19	0	0	0	0	3.73	21.79	0	1.58	0	0	0	0	2.14	0	0
674.3	0	0	0	0	0	0	0	0	0	0	0	0	19.8	0	0	21.22	0	0	0	11.06	0	0	0	4.89	0	0	0	0	0	0	0	4.76	0	0	0	0	0	0	2.26	0	0	0	0	5.33	4.61	0	2.87	0	0
676.3	0	0	0	0	0	0	0	0	0	0	0.54	0	0	0	0	0	0	0	0	0	0	0	2.91	2.69	0	0	0	0	0	0	0	0	0	0	0	2.07	2.06	0	0	0	0	0	0	0	2.05	0	0	0	0
678.3	0	0	0	0	0	0	0	0	0	28.29	0	0	0	0	0	0	0	0	0	0	0	0	0	0	0	0	0	0	0	0	0	0	0	0	0	0	0	0	0	0	0	0	0	0	0	0	0	0	0
680.3	0	0	0	0	0	0	0	0	0	0	1.4	0	0	0	0	0	0	0	0	6.01	0	0	0	0	5.48	0	0	0	0	0	0	0	0	0	0	0	0	0	0	0	0	0	0	0	0	0	0	0	0
682.3	0	0	0	0	0	0	0	0	0	0	0	0	0	0	0	0	0	0	0	0	0	0	0	0	0	0	0	0	0	0	0	0	0	0	0	0	0	0	0	0	0	0	0	0	0	0	0	0	0
684.3	0	0	0	0	0	0	0	0	0	0	1.48	0	0	0	0	0	0	0	0	2.66	0	0	0	0	0	0	0	0	0	0	0	0	0	0	0	0	0	0	0	0	0	0	0	0	0	0	0	0	0
686.3	0	0	0	0	0	0	0	0	4.05	0	0	50.73	0	0	0	0	0	0	0	0	0	0	2.12	1.26	0	0	1.12	0	0	0	0	0	0	0	0	0	0	0	0	0	0	2.07	0	0	2.34	0	0	0	0
688.3	0	0	0	0	0	0	0	0	0	0	0.49	0	0	0	0	0	0	0	0	0	0	0	0	0	0	0	0	0	0	0	0	0	0	0	0	0	0	0	0	0	0	0	0	0	0	0	0	0	0
690.3	0	0	0	0	0	0	0	0	0	0	0	0	0	0	0	0	0	0	0	0	0	0	0	0	0	0	0	0	0	0	0	0	0	0	0	0	0	0	0	0	0	0	0	0	0	0	0	0	0
692.3	0	0	0	0	0	0	0	0	2.14	0	0	0	0	0	0	0	0	0	0	0	0	0	0	0	0	0	0	0	0	0	0	0	0	0	0	0	0	0	0	0	0	0	0	0	0	0	0	0	0
694.3	0	0	0	0	0	0	0	56.48	4.63	1.96	2.65	0	0	0	0	0	0	0	0	1.47	0	0	0	0	0	0	0	0	0	0	0	0	0	0	0	0	0	0	0	0	0	0	0	0	0	0	0	0	0
696.3	0	0	0	0	0	0	0	0	0	0	0	0	0	0	0	0	0	0	18.62	28.14	0	0	0	0	0	0	0	0	0	0	0	0	0	0	0	0	0	0	0	0	0	0	0	0	0	0	0	0	0
698.3	13.79	0	0	8	0	2.07	0	0	0	0	0.94	0	0	0	0	5.91	0	0	0	0	0	0	0	0	0	0	1.56	0	9.42	0	0	0	0	16.19	0	3.15	2.3	0	6.9	4.29	42.19	0	0	0	0	0	0	0	0
700.3	0	0	0	0	0	0	2.11	0	0	0	0	0	0	0	0	0	0	0	0	0	0	0	0	0	0	0	0	0	0	0	0	0	0	0	0	0	0	0	0	0	0	0	0	0	0	0	0	0	0
702.3	0	0	0	0	0	0	0	0	2.38	0	0	0	0	0	0	0	0	0	0	0	0	0	3.15	0	0	0	0	0	0	0	0	0	0	0	0	0	0	0	0	0	0	0	0	0	0	0	0	0	0
704.3	0	0	0	0	0	0	0	0	0	0	0	0	0	0	0	0	0	0	0	0.95	0	0	0	0	0	0	0	0	0	0	0	0	0	0	0	0	0	0	0	0	0	0	0	0	0	0	0	0	0
706.3	0	0	0	0	0	2.31	0	0	0	0	0.5	0	0	0	0	0	0	0	0	0	0	0	0	0	0	0	0	0	0	0	0	0	0	0	0	0	0	0	0	0	0	0	0	0	0	0	0	0	0
708.3	0	0	0	0	0	0	0	0	0	0	0	0	0	4.52	0	0	0	0	0	0	0	0	0	0	0	0	0	0	0	0	0	0	0	0	0	0	0	0	0	0	0	0	0	0	0	0	0	0	0
710.3	0	0	0	0	0	0	0	0	0	12.44	0	4.36	0	0	0	0	0	0	0	0	0	0	0	0	0	0	0	0	0	0	0	0	0	0	0	0	0	0	0	0	0	0	0	0	0	0	0	0	0
712.3	0	0	0	0	0	0	0	0	0	0	0.56	0	0	0	0	0	0	0	0	0	0	0	0	0	0	0	0	0	0	0	0	0	0	0	0	0	0	0	0	0	0	0	0	0	0	0	0	0	0
714.3	0	0	0	0	0	0	0	0	6.31	0	0	0	0	0	0	0	0	8.13	0	0	0	0	0	0	0	0	0	2.78	0	0	0	41.85	0	0	0	0	2.29	0	1.14	1.82	1	0	0	0	0	0	0	4.35	0
716.3	0	0	0	0	0	0	0	0	0	0	0.42	0	28.96	0	0	0	71.41	0	0	0	0	0	0	0	0	0	0	0	0	0	0	13.46	0	0	0	0	0	0	0	0	0	0	0	0	0	0	0	0	0
718.3	0	0	0	0	0	0	0	0	0	0	0	0	0	0	0	0	0	0	0	0	0	0	0	0	0	0	0	0	0	0	0	0	0	0	0	0	0	0	0	0	0	0	0	0	0	0	0	0	0
720.3	0	0	0	0	0	0	1.35	0	0	0	0	0	0	0	0	0	0	0	0	0	0	0	0	0	0	0	0	0	0	0	0	0	0	0	0	0	0	0	0	0	0	0	0	0	0	0	0	0	0
722.3	0	0	0	0	0	0	0	0	0	0	0	0	0	0	0	0	0	0	0	0	0	0	0	0	0	0	0	0	0	0	27.75	0	0	0	0	0	0	0	0	0	0	0	0	0	0	0	0	0	0
724.3	0	0	0	0	0	0	0	0	0	0	0.42	0	0	0	0	0	0	0	0	0	0	0	0	0	0	0	0	0	0	0	0	0	0	0	0	0	0	0	0	0	0	0	0	0	0	0	0	0	0
726.3	0	0	0	0	0	0	1.35	0	2.23	0	0	0	0	0	0	0	0	0	0	0	0	0	0	0	0	0	0	0	0	0	0	0	0	0	0	0	0	0	0	0	0	0	0	0	0	0	0	0	0
728.3	0	0	0	0	0	0	0	0	0	0	0.34	0	0	12.23	0	0	0	0	0	0	0	0	0	0	0	0	0	3.35	0	0	0	0	0	0	0	0	0	0	0	0	0	0	0.74	0	0	0	0	0	0
730.3	0	0	0	0	0	0	0	0	1.91	0	0.76	0	0	0	0	0	0	0	0	0	0	0	0	2.89	7.36	0	2.35	11.77	1.44	0	0	0	0	0	0	0	2.06	0	0	0.87	0	1.95	3.94	0	6.21	0	0.96	0	0
732.3	1.63	2.55	4.19	0	2.28	2.78	0	0	0	0	0	0	0	0	0	0	0	0	0	0	0	0	11.94	0	0	0	0	0	0	0	0	0	0	0	0	0	0	0	0	0	0	0	0	0	0	0	0	0	0
734.3	1.42	0	0	0	0	0	0	0	1.65	0	2.85	0	0	0	0	0	0	0	0	0	0	0	0	1.69	0	0	2.04	2.86	1.63	0	0	0	0	0	0	0	0	28.67	10.56	1.95	4.72	0	0	0	4.48	0	0.97	0	0
736.3	0	0	0	0	0	0.97	3.72	0	0	1.17	0.47	0	0	0	0	0	0	0	0	0	0	0	0	0	7.67	0	0	0	0	0	0	0	0	0	0	4.31	5.87	0	0	0	0	0	2.53	0	0	0	0	0	0
738.3	0	0	0	0	0	0	0	0	0	0	0	0	0	0	0	0	0	0	0	0	0	0	0	0	0	0	0	3.87	0	0	0	0	0	0	0	0	0	0	0	0	0	0	0	0	0	0	0	0	0
740.3	0	0	0	0	0	0	0	0	0	0	0	0	0	0	0	0	0	0	0	0	0	0	0	0	0	0	0	0	0	0	0	0	0	0	0	0	0	0	0	0	0	0	0	0	0	0	0	0	0
742.3	0	0	0	0	1.27	0	0	0	0	0	4.61	0	0	0	0	17.04	0	0	0	0	0	0	0	0	0	0	0	0	0	0	0	0	0	0	100	0	0	0	0	0	0	0	0	0	0	0	0	0	0
744.3	0	0	0	0	0	0	5.83	0	0	10.39	0	0	0	0	0	8.26	0	0	0	0	0	0	0	0	0	0	0	0	0	0	0	0	0	0	0	0	0	0	0	0	0	0	0	0	0	0	0	0	0
746.3	0	0	0	0	0	0	0	0	0	0	0	0	0	9.1	0	0	0	0	0	0	0	0	0	0	0	0	0	0	0	0	0	0	0	0	0	0	0	0	0	0	0	0	0	0	0	0	0	0	0
748.3	0	0	0	0	0	0	0	0	0	0	0	0	0	0	0	0	0	0	0	0	0	0	0	0	0	0	0	0	0	100	0	0	0	0	0	0	0	0	6.05	0	0	0	0	0	0	0	0	0	0
750.3	0	0	0	5.84	0	0	0	0	0	0	0.62	0	0	0	0	0	0	24.91	9.16	0	0	0	0	0	0	26.31	0	0	0	0	0	0	0	0	0	0	0	6.89	0	2.54	17.16	0	1.29	0	0	0	0	0	0
752.3	0.96	0	0	0	0	0.94	1.98	0	3.01	0	1.08	0	0	32.36	0	0	0	0	0	0	0	0	0	0	0	0	5.99	0	0	0	0	0	0	0	0	0	1.43	20.05	0	0	0	63.88	0	0	0	0	0	0	0
754.3	19.07	48.96	40.89	28.22	53.04	23.97	0	0	0	0	2.08	0	0	0	37.1	0	0	25.26	33.86	24.54	0	0	0	12.29	3.14	0	0	4.32	4.22	0	0	0	0	0	0	0	0	0	2.57	0	0	0	19.84	16.22	9.46	4.06	34.29	13.56	65.55
756.3	0	0	0	0	0	2.6	0	0	0	1.66	0	4.44	0	4.64	0	0	0	0	0	0	0	0	0	0	0	0	0	0	0	0	0	0	0	0	0	0	0	0	0	0	0.81	0	0	0	0	0	0	0	0
758.3	0	0	0	0	0	0	0	0	0	0	0	0	0	0	0	0	0	0	0	0	0	0	0	0	0	0	0	0	0	0	0	0	0	0	0	0	0	0	0	0	0	1.53	0	0	0	0	0	0	0
760.3	1.25	0	0	0	1.58	0.78	0	0	0	0	0	0	0	0	0	0	0	0	0	0	0	0	11.03	5.79	0	0	0	0	0	0	0	0	0	0	0	3.24	0	0	0	0	0	0	0.98	0	1.77	0	0	0	0
762.3	0	0	0	0	0	0	0	0	39.3	0	0.7	0	0	0	0	0	0	0	0	0	0	0	0	0	0	0	0	0	0	0	0	0	0	0	0	0	0	0	0	0	0	0	0	0	0	0	0	0	0
764.3	0	0	0	0	0	0	0	0	0	0	0	0	0	0	0	0	0	0	0	0	0	0	0	0	0	0	0	0	0	0	0	0	0	0	0	0	0	0	0	0	0	0	0	0	0	0	0	0	0
766.3	0	0	0	0	0	0	0	0	0	0	0.38	0	0	0	0	0	0	0	0	7.88	0	0	0	0	0	0	0	0	0	0	0	0	0	0	0	0	0	0	1.35	0	0	0	0	0	0	0	0	0	0
770.3	0	0	2.63	0	2.96	1.01	0	0	0	0	1.29	0	0	0	0	0	0	0	0	0	0	0	0	0	0	12.08	0	0	3.26	0	0	0	0	0	0	0	0	0	0	0	0	1.96	2.94	0	0	0	0	0	0
772.3	0	0	0	0	0	0	0	0	0	3	0	3.04	0	0	0	0	0	0	0	0	0	0	9.62	1.41	0	0	2.13	0	0	0	0	0	0	0	0	0	0	0	1.82	0	0	0	0	0	5.22	0	1.2	0	0
774.3	0	0	0	0	0	0	0	0	0	0	0	0	0	0	0	0	0	0	0	0	0	0	0	0	0	0	0	0	0	0	0	0	0	0	0	0	0	0	0	0	0	0	0	0	0	0	0	0	0
776.3	0	0	0	0	0	0.64	0	0	0	0	0	0	0	0	0	0	0	0	0	0	0	0	0	0	0	0	0	0	0	0	0	0	0	0	0	0	0	0	0	0	0	0	0	0	0	0	0	0	0
778.3	0	0	0	0	0	0	0	0	0	0	10.6	2.81	0	11.12	0	0	0	0	0	0	0	0	0	0	2.48	0	0	0	0	0	0	0	0	0	0	0	1.17	0	0	0	0	0	0	0	0	0	0	0	0
780.3	0	0	0	0	0	0	0	0	0	0	0	0	0	0	0	0	0	0	0	0	0	0	0	0	0	0	0	0	0	0	0	0	0	0	0	0	0	0	0	0	0	0	0	0	0	0	0	0	0
782.3	0	0	0	0	0	0	0	5.14	0	0	0	0	0	0	0	0	0	0	0	0	0	0	0	0	4.67	4.91	0	0	3.04	0	0	0	0	0	0	0	9.12	0	0	0	0	0	0	0	0	0	0	0	0
784.3	0	0	0	0	0	0	0	0	1.52	17.93	4.51	0	0	0	0	0	0	0	0	0	0	0	0	0	0	0	0	0	0	0	0	0	0	0	0	0	8.85	0	4.57	0	0	0	0	0	0	0	0	0	0
786.3	0	0	0	0	0	0.76	4.19	2.34	0	0	0	0	0	0	0	0	0	0	0	0	0	0	2.95	0	0	0	0	0	0	0	0	0	0	0	0	5.67	0	0	0	0	0	0	0	0	0	0	0	0	0
788.3	0	0	0	0	0	0	0	0	1.23	0	0	0	0	0	0	0	0	0	0	0	0	0	0	0	0	0	0	0	0	0	41.12	7.17	0	0	0	0	0	0	0	0	0	0	0	0	0	0	0	0	0
790.3	0	0	0	0	0	0	0	0	0	0	0	0	0	0	0	0	0	0	0	0	0	0	0	0	0	0	0	0	0	0	0	0	0	0	0	0	0	0	0	0	0	0	0	0	0	0	0	22.68	0
792.3	0	0	0	0	0	0	0	0	0	0	0	0	28.01	8.93	0	0	0	0	0	0	0	0	0	0	0	0	0	0	0	0	0	0	0	0	0	0	0	0	0	0	0	0	0	0	0	0	0	0	0
794.3	0	0	0	0	0	0	0	0	0	0	0	0	0	0	0	0	0	0	0	0	0	0	0	0	0	0	0	0	0	0	0	0	0	0	0	0	0	0	0	0	0	2.8	0	0	1.91	1.97	0	0	0
796.3	0	0	0	0	0	0	0	0	0	0	0	0	0	0	0	0	0	0	0	0	0	0	0	0	0	0	0	0	0	0	0	0	0	0	0	39.31	0	23.27	0	0.84	0	0	3.79	0	0	0	0	0	0
798.3	0	0	0	0	0	0	0	0	0	0	0.51	0	0	0	0	0	0	0	0	0	0	0	0	0	0	31.47	0	0	0	0	0	0	0	0	0	0	0	0	0	0	0	0	0	0	0	0	0	0	0
800.3	0	0	0	0	0	0	0	0	0	0	0.32	0	0	0	0	0	0	0	0	0	0	0	0	0	0	0	0	0	0	0	0	0	0	0	0	0	0	0	0	0	0	0	0	0	0	0	0	7.18	0
802.3	0	0	0	0	0	0	0	0	0	0	0	0	0	0	0	0	0	0	0	0	0	0	0	0	0	0	0	0	0	0	0	0	0	0	0	0	0	0	0	0	0	0	0	0	0	0	0	0	0
804.3	0	0	0	0	0	0	0	0	0	0	0	0	0	0	0	0	0	0	0	0	0	0	0	0	0	0	0	0	0	0	0	0	0	0	0	0	0	0	0	0	0	0	0	0	0	0	0	0	0
806.3	0	0	0	0	0	0	0	0	1.7	0	0	0	0	0	0	0	0	0	0	0	0	0	0	0	0	0	0	0	0	0	0	6.48	0	0	0	0	0	0	0	0	0	1.24	0	0	0	0	0	0	0
808.3	0	0	0	0	0	0	0	0	0	0	0	0	0	0	0	0	0	0	0	0	0	0	5.37	0	0	0	0	0	0	0	0	0	0	0	0	2.39	0	0	0	0	0	0	0	0	0	0	0	0	0
810.3	0	0	0	0	0	0	0	0	0	0	0.41	0	0	0	0	0	0	0	0	0	100	0	0	0	0	0	0	0	0	0	0	0	0	0	0	0	0	0	0	9.41	0	0	0	0	0	78.18	0	0	0
812.3	0	5.29	2.46	0	4.03	0	6.18	0	0	0	0	0	0	0	0	0	0	6.65	0	0	0	0	0	0	0	0	0	0	0	0	0	0	0	0	0	0	0	0	0	0	0	0	0	0	0	0	0	0	0
814.3	0	0	0	0	0	0	0	0	0	0	0	0	0	0	0	0	0	0	0	0	0	0	0	0	0	0	0	0	0	0	0	0	0	0	0	0	0	0	0	0	0	0	0	0	0	0	0	0	0
816.3	0	0	0	0	0	0	16.42	0	0	0	0	0	0	0	0	0	0	10.48	0	0	0	0	0	0	0	0	0	0	0	0	0	0	0	0	0	0	0	0	0	0	0	0	0	0	0	0	0	0	0
818.3	0	0	0	0	0	0	0	0	0	0	0	0	0	0	0	0	0	0	0	0	0	0	0	0	0	0	0	0	0	0	0	0	0	0	0	0	0	0	0	0	0	0	0	0	0	0	0	0	0
820.3	0	0	0	0	0	0.64	0	0	0	0	0	0	0	0	0	0	0	0	0	0	0	0	0	0	0	0	0	0	0	0	0	0	0	0	0	0	0	0	0	0	0	0	0	0	1.93	1.57	31.22	0	0
826.3	0	0	0	0	0	0	0	0	0	0	0	0	0	0	0	0	0	0	0	0	0	0	0	0	0	0	0	0	0	0	0	0	0	0	0	0	15.08	0	0	0	0	0	0	0	0	0	0	0	0
828.3	0	0	0	0	0	0	0	0	0	0	0	0	0	0	0	0	0	0	0	0	0	0	0	0	0	0	0	0	0	0	0	0	0	0	0	0	0	0	0	0	0	0	0	0	0	0	0	0	0
830.3	0	0	0	0	0	0	0	0	0	5.44	0	0	0	0	0	0	0	0	0	0	0	0	0	0	0	0	0	0	0	0	0	0	0	0	0	0	0	0	0	0	0	0	0	0	0	0	0	0	0
832.3	0	0	0	0	0	0	0	0	0	1.12	0	0	0	0	0	0	0	0	0	0	0	0	0	0	0	0	0	0	0	0	0	0	0	0	0	0	0	0	0	0	0	0	0	0	0	0	0	0	0
834.3	0	0	0	0	0	0	0	0	0	0	0.85	0	0	0	0	0	0	0	0	0	0	0	0	0	0	0	0	0	0	0	0	0	0	0	0	0	0	0	0	0	0	0	0	0	0	0	0	0	0
840.3	0	0	0	0	0	0	0	0	0	0	0	0	0	0	0	0	0	0	0	0	0	0	0	0	0	0	0	0	0	0	0	0	0	0	0	0	0	0	0	0	0	0	0	0	0	0	0	0	0
842.3	0	0	0	0	0	0	0	0	0	0	0	0	0	0	0	0	0	0	0	0	0	0	0	0	0	0	0	0	0	0	0	0	0	0	0	0	0	0	0	0	0	0	0	0	0	0	0	0	0
844.3	0	0	0	0	0	0	0	0	0	0	0	0	0	0	0	0	0	0	0	0	0	0	0	0	0	0	0	0	0	0	0	0	0	0	0	0	0	0	0	9.94	0	0	0	0	0	0	4.16	0	0
846.3	0	0	0	0	0	0	0	0	0	0	0	0	0	0	0	0	0	0	0	0	0	0	0	0	0	0	0	0	0	0	0	0	0	0	0	0	0	0	0	0	0	0	0	0	0	0	0	0	0
848.3	0	0	0	0	0	0	0	0	0	0	8.53	0	0	0	0	0	0	0	0	0	0	0	0	0	0	0	0	0	0	0	0	0	0	0	0	0	0	0	0	1.06	0	0	0	0	0	0	0	0	0
850.3	0	0	0	0	0	0	0	0	0	0	0	0	0	0	0	0	0	0	0	0	0	0	0	0	0	0	0	0	0	0	0	0	0	0	0	0	0	0	0	0	0	0	0	0	0	0	1.2	0	0
852.3	0	0	0	0	0	0	0	0	0	0	0	0	0	0	0	0	0	0	0	0	0	0	0	0	0	0	0	0	0	0	0	0	0	0	0	0	0	0	0	0	0	0	0.88	0	0	0	0	0	0
854.3	0	0	0	0	0	0	0	0	0	0	0	0	0	0	0	0	0	0	0	0	0	0	0	0	0	0	0	0	0	0	0	0	0	0	0	0	0	0	0	9.54	0	0	0	0	0	0	0	0	0
858.3	0	0	0	0	0	1.06	0	0	0	0	0	0	0	0	0	0	0	0	0	0	0	0	0	0	0	0	0	0	0	0	0	0	0	0	0	0	0	0	0	0	0	0	1.12	0	0	0	0	0	0
860.3	0	0	0	0	0	0	0	0	0	0	0	0	0	0	0	0	0	0	0	0	0	0	0	0	0	0	0	0	0	0	0	0	0	0	0	0	0	0	0	0	0	0	0	0	0	0	0	0	0
866.3	0	0	0	0	0	0	0	0	0	0	0	0	0	0	0	0	0	0	0	0	0	0	0	0	0	0	0	0	0	0	0	0	0	0	0	0	0	0	0	0	0	0	0	0	0	0	0	0	0
878.3	0	0	0	0	0	0	0	0	0	0	0	0	0	0	0	0	0	0	0	0	0	0	1.34	0	0	0	0	0	0	0	0	0	0	0	0	0	0	0	0	0	0	0	0	0	0	0	0	0	0
892.3	0	0	0	0	0	0	0	0	0	0	0	0	0	0	0	0	0	0	0	0	0	0	0	0	0	0	0	0	0	0	0	0	0	0	0	0	0	0	0	0	0	0	0	0	0	0	0	0	0
896.3	0	0	0	0	0	0	0	0	0	0	0	0	0	0	0	0	0	0	0	0	0	0	0	0	0	0	0	0	0	0	0	0	0	0	0	0	0	0	0	0	0	0	0	0	0	0	0	0	0
900.3	0	0	0	0	0	0	0	0	0	0	0	0	0	0	0	0	0	0	0	0	0	0	0	0	0	0	0	0	0	0	0	0	0	0	0	0	0	0	0	0	0	0	0	0	0	0	0	28.67	0
918.3	0	0	0	0	0	0	0	0	0	0	0	0	0	0	0	0	0	0	0	0	0	0	0	0	0	0	0	0	0	0	0	0	0	0	0	0	0	0	0	0	0	0	0	0	0	0	0	0	0
928.3	0	0	0	0	0	0	0	0	0	0	0	0	0	0	0	0	0	0	0	0	0	0	0	0	0	0	0	0	0	0	0	0	0	0	0	0	0	0	0	0	0	0	0	0	0	0	0	0	0
946.3	0	0	0	0	0	0	0	0	0	0	0	0	0	0	0	0	0	0	0	0	0	0	0	0	0	0	0	0	0	0	0	0	0	0	0	0	0	0	0	0	0	0	0	0	0	0	0	0	0
958.3	0	0	0	0	0	0	0	0	0	0	0.5	0	0	0	0	0	0	0	0	0	0	0	0	0	0	0	0	0	0	0	0	0	0	0	0	0	1.8	0	0	0	0	0	0	0	0	0	0	0	0
996.3	0	0	0	0	0	0	0	0	0	0	0	0	0	0	0	0	0	0	0	0	0	0	0	0	0	0	0	0	0	0	0	0	0	0	0	0	0	0	0	0	0	0	0	0	0	0	0	0	0
998.3	0	0	0	0	0	0	0	0	0	0	0	0	0	0	0	0	0	0	0	0	0	0	0	0	0	0	0	0	0	0	0	0	0	0	0	0	0	0	0	0	0	0	0	0	0	0	0	0	0
Sample	4_1	4_2	4_3	4_4	4_5	4_6	5_1	5_2	5_3	5_4	5_5	5_6	6_1	6_2	6_3	6_4	6_5	12_1	12_2	12_3	12_4	12_5	12_6	14_1	14_2	14_3	14_4	14_5	14_6	15_1	15_2	15_3	15_4	15_5	15_6	21_1	21_2	21_3	21_4	21_5	21_6	23_1	23_2	23_3	23_4	23_5	23_6	27_1	27_2
Plot	4	4	4	4	4	4	5	5	5	5	5	5	6	6	6	6	6	12	12	12	12	12	12	14	14	14	14	14	14	15	15	15	15	15	15	21	21	21	21	21	21	23	23	23	23	23	23	27	27
Treatment	Mm	Mm	Mm	Mm	Mm	Mm	PP	PP	PP	PP	PP	PP	PF	PF	PF	PF	PF	Ii	Ii	Ii	Ii	Ii	Ii	Nn	Nn	Nn	Nn	Nn	Nn	Ii	Ii	Ii	Ii	Ii	Ii	Nn	Nn	Nn	Nn	Nn	Nn	Mm	Mm	Mm	Mm	Mm	Mm	PF	PF
Replicate	1	2	3	4	5	6	1	2	3	4	5	6	1	2	3	4	5	1	2	3	4	5	6	1	2	3	4	5	6	1	2	3	4	5	6	1	2	3	4	5	6	1	2	3	4	5	6	1	2
Depth	0-7.5	0-7.5	0-7.5	0-7.5	0-7.5	0-7.5	0-7.5	0-7.5	0-7.5	0-7.5	0-7.5	0-7.5	0-7.5	0-7.5	0-7.5	0-7.5	0-7.5	0-7.5	0-7.5	0-7.5	0-7.5	0-7.5	0-7.5	0-7.5	0-7.5	0-7.5	0-7.5	0-7.5	0-7.5	0-7.5	0-7.5	0-7.5	0-7.5	0-7.5	0-7.5	0-7.5	0-7.5	0-7.5	0-7.5	0-7.5	0-7.5	0-7.5	0-7.5	0-7.5	0-7.5	0-7.5	0-7.5	0-7.5	0-7.5
[truncated: 98 more columns]
