# Supplementary material for: Bacterial and fungal communities respond differently to varying tillage depth in agricultural soils
Source: PeerJ. 2017 Oct 17;5:e3930. doi: 10.7717/peerj.3930 (PMC5649590; doi:10.7717/peerj.3930)
Supplement: Supplemental Information 3 — Relative abundances of bacterial operational taxonomic units in samples based on DNA sequence length of bacterial intergenic spacer regions (between bacterial 16S rRNA and 23s rRNA genes). [file peerj-05-3930-s003.xlsx]

## Sheet: Sheet1
	A01	A01-MTT2	A02	A02-MTT2	A03	A03-MTT2	A04	A04-MTT2	A05	A05-MTT2	A06	A06-MTT2	A07	A07-MTT2	A08	A08-MTT2	A09	A09-MTT2	A10	A10-MTT2	A11	A11-MTT2	A12	A12-MTT2	B01	B01-MTT2	B02	B02-MTT2	B03	B03-MTT2	B04	B04-MTT2	B05	B05-MTT2	B06	B06-MTT2	B07	B07-MTT2	B08	B08-MTT2	B09	B09-MTT2	B10	B10-MTT2	B11	B11-MTT2	B12	B12-MTT2	C01
101.1	0.13	0	0	0	0.18	0	0	0	0	0	0	0	0	0	0	0	0	0	0	0	0	0	0	0	0	0	0	0	0	0	0	0	0	0	0	0	0	0	0	0	0	0	0	0	0	0	0	0	0
109.1	0.12	0	0	0	0	0	0	0	0	0	0	0	0	0	0	0	0	0	0	0	0	0	0	0	0	0	0	0	0	0	0	0	0	0	0	0	0	0	0	0	0	0	0	0	0	0	0	0	0
111.1	0.13	0	0	0	0.15	0	0	0	0	0	0	0	0	0	0	0	0	0	0	0	0	0	0	0	0	0	0	0	0	0	0	0	0	0	0	0	0	0	0	0	0	0	0	0	0	0	0	0	0
181.1	0	0	0	0	0.15	0	0	0	0	0	0	0	0	0	0	0	0	0	0	0	0	0	0	0	0	0	0	0	0	0	0	0	0	0	0	0	0	0	0	0	0	0	0	0	0	0	0	0	0
203.1	0.3	0	0	0	0.21	0	0	0	0	0	0	0	0	0	0	0	0	0	0	0	0	0	0	0	0	0	0	0	0	0	0	0	0	0	0	0	0	0	0	0	0	0	0	0	0	0	0	0	0
217.1	0	0	0	0	0.19	0	0	0	0	0	0	0	0	0	0	0	0	0	0	0	0	0	0	0	0	0	0	0	0	0	0	0	0	0	0	0	0	0	0	0	0	0	0	0	0	0	0	0	0
279.1	0	0	0	0	0.24	0	0	0	0	0	0	0	0	0	0	0	0	0	0	0	0	0	0	0	0	0	0	0	0	0	0	0	0	0	0	0	0	0	0	0	0	0	0	0	0	0	0	0	0
285.1	0.79	0	1.33	0	1.12	0	0.99	0	0.81	0	1.54	0	1.33	0	2.86	0	2.75	0	3.34	0	2.13	0	5.8	0	1.14	0	1.54	0	1.36	0	1.32	0	2.59	0	2.61	0	3.51	0	8.22	0	4.07	0	0	0	4.92	0	19.01	0	1.92
287.1	0.6	0	0.59	0	0.5	0.22	0.52	0	0.45	36.67	0.89	0	1.01	0	4.29	0	4.1	0	13.59	0	3.54	0	22.13	0	0.49	0	0	0	0	0	0	0	1.55	0	0	0	5.75	0	11.8	0	4.4	0	26.64	0	6.14	0	33.49	0	5.07
289.1	0	0	0	0	0	0	0.26	0	0	0	0	0	0	0	0	0	0	0	0	0	0	0	0	0	0	0	0	0	0	0	0	0	0	0	0	0	0	0	0	0	0	0	0	0	0	0	0	0	0
291.1	0	0	0	0	0	0	0	0	0	0	0	0	0	0	0	0	0	0	0	0	0	0	0	0	0	0	0	0	0	0	0	0	0	0	0	0	0	0	0	0	0	0	0	0	0	0	0	0	0
293.1	0	0	0	0	0	0	0	0	0	0	0	0	0	0	0	0	0	0	0	0	0	0	0	0	2.36	0	0	0	3.98	0	2.7	0	0	0	0	0	0	0	0	0	0	0	0	0	1.68	0	0	0	0
295.1	0	0	0	0	0	0	0	0	0	0	0	0	0	0	0	0	0	0	0	0	0	0	0	0	2.23	0	0	0	1.63	0	1.16	0	0	0	0	0	0	0	0	0	0	0	0	0	1.99	0	0	0	0
297.1	0	0	0	0	0	0	0	0	0	0	0	0	0	0	0	0	0	0	0	0	0	0	0	0	0.36	0	0	0	2.11	0	1.22	0	0	0	0	0	0	0	0	0	0	0	0	0	0	0	0	0	0
299.1	0	0	0	0	0	0	0	0	0	0	0	0	0	0	0	0	0	0	0	0	0	0	0	0	3.43	0	0	0	6.34	0	4.71	0	0	0	0	0	0	0	0	0	0	0	0	0	1.83	0	0	0	0
301.1	0.24	0	0	0	0	0	0	0	0	0	0.3	0	0	0	0	0	0	0	0	0	0	0	0	0	1.06	0	0	0	0	0	1.85	0	0	0	0	0	0	0	4.32	0	0	0	0	0	2.86	0	0	0	0
303.1	0	0	0	0	0.94	0	0	0	0	0	0	0	0	0	0	0	0	0	0	0	0	0	0	0	0	0	0	0.4	0	0	0	0	0	0	0	0	0	0	0	0	0	0	0	0.37	0	0	0	0	0
305.1	0	0	0	0	0	0	0	0	0	0	0	0	0	0	0	0	0	0	0	0	0	0	0	0	0	0	0	0.31	0	0	0	0	0	0	0	0	0	0	0	0	0	0	0	0.45	0	0	0	0	0
307.1	0	0	0	0	0	0	0	0	0	0	0	0	0	0	0	0	0	0	0	0	0	0	0	0	0	0	0	0	0	0	0	0	0	0	0	0	0	0	0	0	0	0	0	0	0	0	0	0	0
311.1	0	0	0.98	0	0.25	0	0.28	0	0	0	0.34	0	0	0	0	0	0	0	0	0	0	0	0	0	1.59	0	0	0	1.09	0	0	0	0	0	0	0	0	0	0	0	0	0	0	0	0	0	0	0	0
313.1	0.14	0	0	0	0	0	0	0	0	0	0	0	0	0	0	0	0	0	0	0	0	0	0	0	0	0	0	0	1.33	0	0	0	0	0	0	0	0	0	0	0	0	0	0	0	0	0	0	0	0
315.1	13.4	1.08	12.27	0	6.22	8.12	11.18	0.61	0	0	0	0	0	0	0	0	0	0.96	0	0	0	0	0	0	1.79	1.99	0	5.3	0	0	0	1.02	0	4.12	0	8.74	0	0.41	0	0	0	0	0	0	0	0	0	1.26	0
317.1	5.76	1.13	12.62	0	19.52	11.08	9.86	0.71	33.25	0	18.72	0	1.05	0.29	0.88	0	1.53	0.82	0	0	0	0	0	0	2.77	1.73	0	4.31	0	0	0	1.13	40.09	3.95	12.38	11.98	0	0.51	0	0.49	0	0	0	0	0	0	0	1.04	0.91
319.1	0	0	0	0	0	0	0	0	0	0	0	0	0	0	0	0	0	0	0	0	0	0	0	0	0.78	0	0	0	4.44	0	3.3	0	0	0	0	0	0	0	0	0	0	0	0	0	4.85	0	0	0	0
321.1	0	0	0.21	0.67	0	0	0.2	0	0	0	0	0	0.7	0	0	0	0	0	0	0	0	0	0	0	0	0.45	0	0	0	0	0	0	0	0	0	0	0	0	0	0	0	0	0	0	0	0	0	0	0
323.1	0	0	0.27	0	0.23	0	0	0	0	0	0	0	0	0	0	0	0	0	2.07	0	0	0	0	0	2.04	0	0	0	3.83	0	2.96	0	0	0	10.9	0	0	0	3.61	0	0	0	0	0	0	0	0	0	0
325.1	0	0	0	0	0	0	0	0	0	0	0	0	0	0.16	0	0	0	0	0	0	0	0	0	0	0.87	0	0	0	1.51	0	0	0	0	0	0	0	0	0	0	0	0	0	0	0.45	0	0	0	0.39	0
327.1	0	0	0.17	0	0.19	0	0	0	0	0	0.36	0	0	0	0	0	0	0	0	0	0	0	0	0	2.17	0	0	0	3.92	0	2.49	0	0	0	0	0	0	0	0	0	1.7	0	0	0	0	0	0	0	0
329.1	0	0	0	0	0	0	0	0	0	0	0	0	0	0	0	0	0	0	0	0	0	0	0	0	0.66	0	0	0	0.87	0	0	0	0	0	0	0	0	0	0	0	0	0	0	0	0	0	0	0	0
331.1	0	0.97	0	0	0.19	0	0	0	0	0	0.56	0	0	0.18	0	0	0	0	0	0	0	0	0	0	0.67	5.81	0	0	0	0	0	0	0	0	0	0	0	0	0	0	0	0	0	0	0	0	0	0	0
333.1	0	0.25	0	0	0	0	0	0.4	0	0	0.37	0.64	0.67	0.89	0	1.48	0	0.67	0	0.45	0	0.65	0	0.6	0	6.36	0	1.38	0	1.34	0	1.06	0	0.36	0	0	0	0.43	0	0.53	0	0.39	0	1.16	0	2.38	0	1.55	0
335.1	0	0	0	0.65	0	0	0	0.59	0	0	0	1.01	0.59	0.51	0	1.58	0	0.81	0	0.56	0.67	0.83	0	0.67	0	0	0	0	0	1.33	0	1.44	0	0.5	0	0	0	0.72	0	1.2	0	0.71	0	1.26	0	1.49	0	1.83	0
337.1	6.99	3.92	11.49	0	7.53	3.5	7.37	1.86	11.08	0	9.72	0.81	1.01	1.49	1.51	0.31	2.98	1.2	0	0.6	0.48	0.47	0	0.83	1.82	5.79	11.64	3.83	1.82	0	2.2	0.78	1.47	1.46	2.76	1.94	0	1.49	0	0.89	0	1.08	0	0.5	0	0	0	0.46	3.12
339.1	8.83	0	10.79	0	6.44	6.27	4.78	1.93	8.65	0	6.41	1.33	0.7	2.09	2.1	0.39	3.81	1.19	1.6	0.47	0.76	0.4	0	1.15	0.75	0	6.75	0	0	0.99	0	1.14	0	1.51	0	2.84	0	1.62	0	1.24	0	1.59	24.56	0.72	0	0	0	0	7.39
341.1	0.33	0.5	2.18	1.13	0	0	1.31	0.72	1.24	0	0	0.37	0.76	0.09	0	0	0.7	0	0	0	0	0	0	0	0.56	1.19	1.49	1.25	0	0	0	0	0	0	0	0	0	0	0	0	0	0	0	0	0	0	0	0	1.06
343.1	0	0.77	0.31	0.75	0	0.28	0.65	0.46	0.57	0	0	2.21	0.56	1.05	0	1.78	1.04	1.55	0.93	1.85	0.76	2.9	0	2.07	0.6	0.91	0	0.33	0	5.55	0	1.96	0	1.1	0	0	0	0	0	1.25	0	1.48	0	0.88	0	1.63	0	2.35	0
345.1	1.65	2.83	0.52	1.26	0.23	0.8	1.55	4.54	0.31	0	0.64	2.6	4.2	2.53	4.25	1.7	4.01	3	2.25	4.1	1.88	2.22	0	0.23	0	0.58	0	0.77	0	0	0	1.93	0	3.24	0	1.41	0	5.09	0	2.28	0	3.13	0	1.34	0	2.04	0	1.23	3.06
347.1	1.49	5.21	0	0.77	0	0.93	0.54	5.64	0	0	0	4.37	3.97	6.07	6.45	3.09	5.52	2.76	8.78	4.14	4.71	2.6	3.09	0	0	0.32	0	0.32	0	0	0	4.73	0	3.35	0	1.81	9.11	7.55	0	3.91	0	6.73	13.58	2.73	0	5.98	0	0.99	0.96
349.1	0	0.4	0	0.71	0	0	0	0	0	0	0	0.37	0.52	0	1.19	0.16	1.09	0.32	0	0	1.71	0.35	0	0.74	0	0.58	0	0.95	0	2.4	0	0.74	0	0	0	0	0	0	0	0	0	0	0	0.35	0	0	0	0.38	0
351.1	0.21	0	0.42	0	0	0.66	0	0	0	0	0	0	0	0.33	0	0	0	0	0	2.77	0	1.33	0	0.21	0	0	0	0	0	0	0	0	0	0	0	0.42	0	0	0	0	0	1.63	0	0.33	0	0	0	0	0
353.1	0	0	0	9.17	0	0	0	0	0	0	0	0	0	0	0	0	0	0	0	0	0	0	0	9.18	3.01	0.25	0	0	4.58	0	4.34	0	0	0	0	0	0	0	0	0	2.57	0	0	0	0	0	0	0	0
355.1	0	0	0.33	9.33	0	0.38	1.05	0	0.42	0	3.32	1.99	0.36	0.49	0	2.71	0	0	0	0	1.71	1.35	0	8.57	1.66	0.38	1.59	0	2.1	3.37	1.7	0	0	6.67	0	0	16.21	0.83	0	0	2.08	1.48	0	0	0	0	0	1.68	0.57
357.1	0.75	0	0	0	0.63	0	0	0	0	0	0	0	0.65	0.33	0	0	0	0	0	1.05	2.72	0	0	0	0	0	0	0	0	0	0	0	0	2.04	0	0	0	0	0	0	0	1.09	0	0	0	3.81	0	0	0
359.1	0	0	0	0	0.29	0	0	0	0	0	0.91	0	0.67	0	0	0	0	0.69	0	0.9	0	0.17	0	0	0.67	0.63	0	1	0.87	0	0	0	0	0	0	0	0	0	0	0	0	0	0	0	0	0	0	0	0.9
361.1	0.26	0	0.55	0.86	0	0	0.27	0	1.23	0	0.67	0.4	0.49	0	0	0	0	0	0	0.65	0	0.28	0	0.45	0	0.64	0	0	0	3.11	0	0	0	1.91	0	0	0	0	0	1	0	0	0	0	0	0	0	0	0
363.1	0	0	0	9.63	0	0	0	0	0	0	0	0.21	0	0.87	0	0	0	0	0	0	0.96	1.28	0	7.34	0	0	0	0	0	3.86	0	0	0	1.73	0	0	6.03	1.86	0	0	0	0.54	0	0	0	0	0	0	0
365.1	0.57	0.28	0	10.39	0.28	0	0	0	0	0	0	0.41	0.57	0.22	0	1.8	0	0	0	0.63	1.46	1.09	0	7.17	0	0.48	0	1.08	0	4.09	0	1.08	0	2.37	0	0	12.82	2.29	0	0	0	1.22	0	0	0	0.86	0	0.49	0
367.1	0	0	0	0	0	0	0	0	0	0	0	0	0	0.13	0	0	0	0	0	0	0	0	0	0.32	2.33	0	0	0	2.76	0	1.62	0.89	0	0	0	1.92	2.27	0	0	2.14	0	0	0	1.76	0	0.33	0	0	0
369.1	0	0	0	0.25	0	0	0	0	0	0	0	0	0	0	0	0	0	0	0	0	0	0	0	0.14	0	0	0	0	0	0	0	0	0	0	0	0	0	0	0	0	0	0	0	0	0	0	0	0	0
371.1	0.2	0.58	0.34	0.88	0	0	0	0	0	0	0	0	0	0.22	0	0.46	0	0	0	0	0	0	0	0.46	0	0.27	0	0	0	0.93	0	0	0	0	0	0	0	0	0	0	0	0	0	0	0	0	0	0	0
373.1	0.77	0.4	0.71	1.03	0.48	0	0.54	0	0.33	0	0	0	0	0.78	0	1.63	0	0	0	0	0.78	0.37	0	0.51	1.7	0.39	0	0	0	0.91	0	0	0	0	0	0	0	0	0	0	0	0.62	0	0.93	0	0.88	0	0	0
375.1	0	0	0	0	0.27	0	0	0	0	0	0	0	0	0.24	0	0	0	0	0	0	0	0	0	0	0	0	0	0	1.25	0	0	0	0	0.22	0	0	0	0	0	0	0	0	0	1.09	0	1.39	0	0	0
377.1	0	0	0	0	0	0	0	0	0	0	0	0	0	0	0	0.89	0	0	0	0	0	0	0	0.23	0	0	0	0	0	0	0	0	0	0	0	0	0	0	0	0	0	0	0	0	0	0	0	0	0
379.1	0.14	1.12	0.25	0	0.32	1.59	0	0	0.43	0	0	0	0	0.35	0	0.25	0	0.65	0	0.66	0	0.54	0	0	0	1.46	0	0.64	0	0	0	0	0	0.56	0	0.37	0	0	0	0	0	0	0	0	0	0	0	0	0
381.1	0.69	0	0.23	0	0.43	0.4	0.37	0.85	0.44	0	0	0.48	0.89	0.97	0	0.5	0.72	1.83	0	1.08	0	1.32	0	0.39	1.8	0.34	0	0.88	0	1.02	0	0	0	0.64	0	0.61	0	0.82	0	0	0	0	0	0	0	0	0	0.9	0
383.1	1.16	0	0	0	0.32	0	0.32	0	0.66	0	0	0.27	0	0	0	0	0	0	0	0	0	0	0	0	0.99	0.54	0	0.53	2.16	0	3.28	0	0	0	0	0	0	0	0	0	0	0	0	0	4.24	0	0	0	0
385.1	0	0.26	0	0	0	0.29	0	0	0.32	0	0	0	0	0.14	0	0.23	0	0	0	0	0	0	0	0	0	0.46	0	0.32	0	0	0	0	0	0	0	0	0	0	0	0	0	0	0	0	0	0	0	0	0
387.1	0	0	0.29	0	0	0	0	0	0	0	0	0	0	0.18	0	0.24	0	0	0	0	0	0.43	0	0.57	1.74	0	0	0	1.02	0	0	0	0	0	0	0	0	0	0	0	0	0	0	0	0	0	0	0	0
389.1	0.42	0	0	0	0.24	0	0	0	0	0	0	0	0	0	0	0	0	0	0	0	0	0	0	0	0	0	0	0	0	0	0	0	0	0	0	1.2	0	0	0	0	0	0	0	0	0	0	0	0	0
391.1	0.27	0	0	0	0	0.3	0	0	0	0	0	0	0	0	0	0	0	0	0	0	0	0	0	0	4.79	0	0	0	4.49	0	4	0	1.5	0	0	0	0	0	0	0	2.99	0	0	0	4.09	0	0	0	0
393.1	0	0.3	0	0	0	0	0	0	0	0	0	0	0	0	0	0.59	0	0	0	0.33	0	0.37	0	1.26	0.7	0	0	0.45	2.83	1.81	2.92	0	0	0	0	0	0	0	0	0	3.09	0	0	0	4.18	0	0	0	0
395.1	1.79	0.33	1.38	0.28	0	0	0.88	0.39	0	0	0	1.61	1.32	0	0	1.95	0	0.65	0	0.78	2.08	1.52	0	1.74	7.79	0	0	0	1.2	2.16	1.2	0	0	0	0	0	0	0	0	0	0	1.45	0	0	1.18	2.73	0	1.16	0
397.1	0.56	0	0.38	0	0.42	0	0	0	0.41	0	0	0	0	0	0	0	0	0	0	0.46	0	0	0	0	4.24	0	0	0	12.05	0	10.05	0	2.01	0	2.34	0	0	0	9.3	0	8.8	0	0	0	6.61	0	0	0.85	0
399.1	0	0.23	0.44	1.7	0	0	0	0	0	0	0	0	0	0	0	0	0	0	0	0	0	0.36	0	1.68	0	0	0	0	0	2.85	0	0	0	0.35	0	0	0	0	0	0	0	0	0	0	0	0	0	0.92	0
401.1	0	0	0	0.38	0	0	0	0	0	0	0	0	0	0.25	0	0	0	0	0	0	0	0.42	0	0.37	0	0	0	0	0	0	0	0	0	0	0	0	0	0	0	0	0	0	0	0	0	0	0	0.44	0
403.1	0	0	0	0	0	0	0	0	0	0	0	0	0	0	0	0	0	0	0	0.54	0	0	0	0.57	0.7	0	0	0	0	0	0	0	0	0	0	0	0	0	0	0	0	0	0	0	0	0	0	0	0
405.1	0.14	0	0	0	0	0	0.24	0	0.22	0	0	0	0	0	0	0.34	0	0	0	0.31	0	0	0	0.43	0.39	0	0	0	1.05	0	0	0	0	0	0	0	0	0	0	0	0	0	0	0	0	0	0	0	0
407.1	10.58	0.15	2.72	0.66	10.58	3.16	2.62	0.5	5.52	0	2.47	0	0	0.73	0	0	0	0	0	0	0.85	0.28	0	0.59	0	0.74	0	0.37	0	1.52	0	0	0	0.7	0	1.68	0	0	0	0	0	0	0	0	0	0	0	0	1.16
409.1	0	0.8	0	0	0	0.7	0	0	0	0	0	1.6	0	1.44	0	0.81	0	3.54	0	0	0	0.82	0	0.86	0	0.55	0	1.36	0	0.9	0	0	0	0.58	0	0.87	0	0	0	0	0	0	0	0	0	0.88	0	1.68	2.81
411.1	0.18	1.27	0.25	0	0.57	0.94	0	0.49	0	0	0	0.37	0	0.48	0	0.48	0	0.61	0	0.59	0	0.78	0	0.35	0.32	0	0	0.65	0	0.94	0	0	0	0.31	0	1.03	0	0.51	0	0	0	0.55	0	0	0	0	0	0	0
413.1	0.15	1.03	0.96	0	0.4	0	0.32	0.51	0	0	0.73	0	0	0.42	0	0.54	0	0	0	0	0	0.37	0	0.28	1.29	0	0	0	0.61	0	5.2	0	6.32	0	3.22	0	0	0.56	0	0	0	0.75	0	0	2.58	0	0	0	0
415.1	0.63	0	0	1.22	0.16	0	0.46	1.64	0	0	0	1.28	0.65	0	0	0.46	0	0	0	0	0	0.23	0	1.89	0.55	0	0	0	0.97	2.5	0	0	1.3	0	0	0	0	0	0	0	0	0	0	0	1.52	0	0	0	0
417.1	0.96	0.42	0.6	0.32	0.24	0	0	0	0	0	0	0.69	0.47	0.48	0	0.36	0.57	1.17	0	0.6	0	1.44	0	0	1.26	0.7	0	0	1.41	0	3.56	0	2.88	0	3.55	0	0	0	0	0	0	0	0	0	0	0	0	0	0
419.1	0	2.01	0	0	0	0.58	0	2.42	0	0	0	2.69	0.57	0.45	0	1.43	0	0.42	0	1.09	0	2.17	0	0	0	0	0	0	0	0	0	0	0	0	0	0	0	0	0	0	0	1.27	0	0	0	0	0	0	0
421.1	0	0	0	0.98	0	0.61	0	0	0	0	0	0.23	0.73	0.32	0	0.62	0	0.22	0	0	0	0.41	0	1.29	0	0	0	0	0	4.39	0	0	0	0	0	0	0	0	0	0	0	0.53	0	0	0	0	0	0	0
423.1	0	0	0	1.58	0	0	0	0	0	0	0	0	0	0	0	0	0	0	0.91	0	0	0	0	1.59	0	0	0	0	0	3.21	0	0	0	0	0	0	0	0	0	0	0	0	0	0	0	0	0	0	0
425.1	0	0	0	0.56	0	0	0	0	0	0	0	0	0	0	0	0	0	0	0	0	1.45	0	0	0	0	0.23	0	0	0	0	0	0	0	0	0	0	0	0	0	0	0	0	0	0	0	0	0	0	0
427.1	0	0	0	0	0	0	0	0	0	0	0	0.19	0	0	0	0	0	0	0	0	0	0	0	0	0	0.24	0	0	0	0	0	0	0	0	0	0	0	0	0	0	0	0	0	0	0	0	0	0	0
429.1	0.18	0.46	0	1.67	0.32	0	0.22	1.46	0	0	0	2.87	4.18	0.61	3.64	1.63	4.11	1.41	0	2.66	7.22	0.94	7.08	5.18	0	0	4.62	0	0	2.81	0	1.39	0	0.8	0	0	5.03	0.75	3.46	0	0	1.42	0	1.37	2.23	1.24	0	2.19	0
431.1	0.3	0.42	0.32	0.28	0	0	0.89	0	0	0	0	0	0	0.1	0	0	0	0.24	0	0	0	0.65	0	0	0.79	0.17	0	13	0.73	0	0	0.49	0	0	0	0	0	0	0	0	0	0	0	0	0	0	0	0	0
433.1	12.77	4.35	7.51	2.12	5.93	10.33	10.38	5.25	3.74	0	1.2	2.69	1.96	6.31	1.07	0.48	1.31	4.64	0	4.14	0	0.23	0	0.5	2.5	4.43	7.65	10.52	0	0	0	5.34	3.46	6.16	3.51	12.31	0	5.75	0	8.95	0	3.64	0	5.84	0	0.76	0	6.97	3.88
435.1	0	0.34	0	0	0	0	3.51	1.6	1.27	0	0.5	1.98	2.34	0	1.29	0	1.79	0	2.64	1.48	0.65	0	0	0	1.32	1.43	5.51	1.04	1.34	0	0	0	0	0	0	0.5	0	0.73	0	0.84	2.59	1.85	0	0	0	0	0	0	6.23
437.1	0	0	0	0	0	0.18	0	0	0	0	0	0	0	0.1	0	0	0	0	0	0	0	1.96	0	0	0	0	0	0	1.47	0	0	0	0	0	0	0	0	0	0	0	2.89	0	0	0	0	0	0	0	0
439.1	0	0	0	0	0	0	0	0	0	0	0	0	0	0	0	0	0	0	0	0	0	0	0	0.57	0	0	0	0	0	0	0	0	0	0	0	0	0	0	0	0	0	0	0	0	0	0	0	0	0
441.1	0	0	0	0	0	0	0	0	0	0	0	0.3	0.36	0	0	0	0	0	0	0	0	0	0	0	0.57	0	0	0	0	0	0	0	0	0	0	0	0	0	0	0	0	0	0	0	0	0	0	0	0
443.1	0	0	0	0	0	0	0	0	0	0	0	0	0	0	0	0	0	0	0	0	0	0	0	0	0	0	0	0	0	0	0	0	0	0	0	0	0	0	0	0	0	0	0	0	0	0	0	0	0
445.1	0.77	10.58	0.25	1.88	0.78	3.21	2.99	18.89	0.89	45.14	1.66	10.06	8.76	11.95	7.27	12.52	4.52	16.43	2.96	19.14	5.52	10.27	3.82	3.94	0	9.44	8.25	13.33	0	6.6	0	13.09	0	8.23	7.19	3.93	4.41	17.54	0	10.67	0	14.16	0	15.88	4.19	15.21	0	16.87	4.88
447.1	0	0	0	2.2	0	0	0	0	0.31	0	0.37	0	3.55	0	6.29	0	4.01	0	7.3	0	4.85	0	7.38	0.43	0	0	0	0	0	2.29	0	0	0	0	0	0	3.44	0	0	0	0	0	0	0	0	0	0	0	0
449.1	4.52	0	2.69	1.97	0	1.66	0	0	0	0	0	0	0	0	0	0	0	0	0	0	0	0	0	0.54	0	0	0	0	0	1.89	0	0	0	0	0	0.9	0	0	0	0	0	0	0	0	0	0	0	0	0
451.1	0.21	0	0	0	0	0	0	0	0	0	0	0	0	0	0	0.76	0	0	0	0	0	0.85	0	0.37	0	0.25	0	0	0	0	0	0	0	0	0	0	0	0	0	0	0	0	0	0	0	0	0	0	0
453.1	0	0	0	0	0	0	0.59	0	0	0	0	0	0	0	0	0	0	0	0	0	0	0	0	0	0	0	0	0	0	0	0	0	0	0	0	0	0	0	0	0	0	0	0	0	0	0	0	0	0
455.1	0	0	0	0	0	0	0	0	0	0	0	0	0	0	0	0	0	0	0	0	0	0	0	0.66	0	0.48	0	1.01	0	0	0	0	0	0	0	0	0	0	0	0	0	0	0	0	0	0	0	0	0
457.1	0.18	0	0	0	0	0.33	0.93	0	0	0	0	0.36	0	0.46	0	0	0	0.28	0	0.32	0	0.25	0	0.36	0.48	0.39	0	0.82	0	0	0	0	0	0	0	0	0	0	0	1.25	0	0	0	0	0	0	0	0.72	0
459.1	0.27	0	0.58	0.28	2.33	0.48	0	0	2.11	0	0	0	0	0	0	0	0	0	0	0	0	0	0	0	0.59	0.43	0	0.43	0	0	0	0	0	0	0	1.68	0	0	0	0	0	0	0	0	0	0	0	0.66	0
461.1	0	0	0	0.26	0.73	0.59	0	0	0.62	0	0.67	0	0	0	2.24	0.8	0	0	0	0	0	0.24	0	0.62	0	0	0	0	0.6	1.66	0	0	2.38	0	2.61	1.47	0	0	0	0	0	0	0	0	0	0	0	0	0
463.1	0.4	3.65	0	0	0.34	1.03	0	1.12	0	0	0	0	0	0.52	0	1.42	0	1.3	0	1.74	0	0.88	0	0.3	0	0	0	2.33	0	1.76	0	3.95	0	2.3	0	0.79	0	1.59	0	0.83	0	0	0	0.65	0	0.56	0	2	0
465.1	0	0	0	0.44	0.34	1.6	0	1.41	0.27	0	0	1.49	0	0.69	3.62	1.61	0	1.86	0	2.07	1.99	1.5	0	0.69	0	0	0	0	0	2.35	2.23	3.56	0	2.16	2.4	1.05	0	2.36	0	1.53	0	2.14	0	1.38	0	1.36	0	2.77	0
467.1	0	0	6.08	0	0	0	6.25	0	0	0	0	0	0	0	0	0	0	0	0	0	0	0.26	0	0	0	0.75	0	0	0	0	0	0	0	0	0	0	0	0	0	0	0	0	0	0	0	0	0	0	0
469.1	0.39	0	2.06	2.45	0	2.38	2.1	0	0	0	0	0	0	0	0	0	0	0.68	0	0.48	0	0.39	0	0	0	0.37	0	0.57	0	0	0	0	0	1.5	0	0	0	0	0	0	0	0	0	0	0	0	0	0	0
471.1	0.22	0	0	0	0.73	3.13	1.04	2.88	2.23	0	0	2.39	0.55	1.06	0	0.32	0	2.22	0	1.74	0	1.27	0	0	0	0	0	0	0	0	0	0	0	0.59	0	1.54	0	4.03	0	4	0	2.08	0	1.24	0	0	0	2.95	0
473.1	0	0	0	0	0.76	0	0	0	0	0	0	0	0	0	0	0	0	0.52	0	0	0	0	0	0	0.49	0	0	0	0	0	0	0	0	0	0	0	0	0	0	0	0	0	0	0	0	0	0	0	0
475.1	0	0	0	0	0.38	0	0	0	0	0	0	0	0	0	0	0	0	0	0	0	0	0	0	0	0	0	0	0	0	0	0	0	0	0	0	0	0	0	0	0	0	0	0	0	0	0	0	0	0
477.1	2.13	3.1	0.84	0	2.74	0	0	1.19	1.74	0	0.71	4.42	0.42	2.33	0	3.33	0	2.11	0	2.79	0	2.78	0	0	0.6	0.5	4.52	1.22	0	2.69	0	5.05	1.67	1.43	0	0.47	0	2.49	0	1.87	3.05	2.33	0	4.08	0	5.13	0	3.45	0.61
479.1	0.17	0	0.5	0	2.46	1.11	3.59	1.13	0.59	0	0	0	0	0	0	2.65	0	0	0	0	0.91	0	0	0	0	0	1.88	0	0	0.7	0	0	0	0	0	1.36	0	0	0	2.22	0	2.15	0	0	0	0	0	0	0
481.1	0.15	1.04	0.35	0.79	0.21	0.68	0.61	0.66	0.65	0	0.58	0	0.5	0	0	0	0.76	1.09	2.04	0.99	0	0.6	0	0.25	0.4	0	0	0	0	1.23	0	0	0	0.81	0	0	0	0.44	0	0	0	0	0	0	0	0	0	0	0
483.1	0.71	3.45	0	0.69	0	0.64	0	0.64	0	0	0	3.34	0	2.47	0	0.86	0	0.67	0	1.22	0	1.99	0	5.55	3.96	2.29	0	0	3.87	1.1	4.38	1.25	0	3.99	0	0	2.33	0.51	5.56	1.15	0	2.58	0	1.34	2.01	1.58	0	1.36	0
485.1	0	0	0	1.97	0	0	0	0.76	0	0	0	0	0	2.79	0	1.07	0	1.58	1.57	0.6	0	1.33	0	0.37	0	0	0	0	0	2.44	0	1	0	3	0	0	2.28	0.6	7.77	1.64	3.19	2.21	4.83	1.49	0	2.38	0	0	0
487.1	0	1.32	0	0	0	0	0	0	0	0	0	0.53	1.48	0.19	1.18	0.75	1.83	1.19	1	0	0	1.54	0	0.63	0	0	0	0	0	1.34	0	0	0	0	0	0	0	0	0	0	0	0	0	0	0	0	0	0	0
489.1	0	0.35	0	0	0	0	0	0	0.6	0	0	0.32	0	0	0	0.21	0	0.15	0	0	0	0	0	0.35	2	0	0	0	2.44	0	8.9	0	10.94	0	8.94	0	0	0	5.01	0	4.56	0	0	0	8.73	0.46	0	0	0
491.1	0.14	0.44	0.31	0	0	0	0	0	0	0	7.26	0	0	0	0	0	0	0	0	0	0	0	0	0	0	0	0	0	0	0	0	0	0	0	0	0	0	0	0	0	0	0	0	0.77	0	0	0	0.53	0
493.1	0.55	1.12	2.95	0	7.22	3.12	2.54	2.55	2.04	0	13.4	0	0.95	0.23	2.02	0.31	3.36	0.91	0	0	0	0	0	0	2.38	0	0	2.29	1.97	0	0	0	0	0.96	2.96	2.79	0	2.21	0	0	3.09	0	0	0	0	0.37	0	1.29	0
495.1	0.27	0	0	0	2.88	3.99	0.99	1.65	1.06	0	4.67	0	0.68	0.65	2.26	0.5	4.24	0.87	2.89	0	0	2.1	0	0	0	0	0	0	0	0	0	0	0	0.81	2.09	3.08	0	1.3	0	0	0	0	0	0	0	0.75	0	0.62	0
497.1	0	0	0	0	0	0.27	0	0	0	0	0	0	0	0	0	0	0	0	0	0	0	0	0	0	0	0	0	0	0	0	0	0	0	0	0	0	0	0	0	0	0	0	0	0	0	0	0	0	0
499.1	0	0	0	1.23	0	0	0	0	0	0	0	0	0	0	0	0	0	0	0	0	0	0	0	1.31	0	0	0	0	0	0	0	0	0	0	0	0	0	0	0	0	0	0	0	0	0	0	0	0	0
501.1	0.26	0	0	0.5	0	0	0	0	0	0	0	0	0	0	0	0	0	0	0	0	0	0	0	0.71	0	0	0	0	0	0.99	0	0	0	0	0	0	0	0	0	0	0	0	0	0	0	0	0	0	0
503.1	0	0.72	0.38	1.26	0	0	0	0	0	0	0	0	0	0	0	0	0	5.16	0	1.55	0	1.99	0	2.02	0	0	0	0	0	0	0	0	0	0.61	0	0	0	0	0	0	0	0	0	0	0	0	0	0.49	0
505.1	0	0.6	0	0	0	0	0	0	0	0	0	2.75	0.73	0.71	0	0.23	0	4.49	0	0.49	0	0.29	0	0.61	0	0	0	0	0	0	0	0	0	1.28	0	0	0	1.31	0	0	0	0	0	0	0	0	0	0	0
507.1	0	0	1.17	0	0	0	0	0	0	0	0	0	0	0.34	0	0.27	0	0	0	0.35	0	0	0	0	0.54	0	0	0	0	0	0	0	0	0	0	0	0	0	0	0	0	0	0	0	0	0	0	1.1	0
509.1	0	0	0.63	0.68	0	0	0.35	0	0	0	0	0	0	0	0	0	0	0	0	0	0	0	0	0	0	0	0	0	0	0	0	0	0	0	0	0	0	0	0	0	0	0	0	0	0	0	0	0	0
511.1	0	0	0.21	0.58	0	0	0	0	0	0	0	0	0	0	0	0	0	0	0	0	0	0	0	0	0	0	0	0	0	0	0	0	0	0	0	0	0	0	0	0	0	0	0	0	0	0.42	0	0	0
513.1	0	1.03	0	0	0	0.6	0	0	0	0	0	0.35	0	0	0	1.25	0.83	0.31	0	0.41	0	1.55	0	0	0	0	0	0	0	0	0	0	0	0	0	0	0	0	0	0	0	0	0	0	0	0	0	0	0
515.1	0.32	0.71	0.72	0	0.43	0	0.71	1.2	0	0	0	0	0	0	0	0	0	0	0	1.12	0	0.25	0	0.3	3.31	1.19	0	0.58	1.67	0	0	0	0	0	0	0.4	0	0.81	0	0	2.22	0	0	0	0	0	0	0	0
517.1	0.22	0.56	0.23	0.64	0	0.27	0.35	1.29	0	0	0	3.47	3.62	0.42	3.76	0.23	1.83	0	1.1	1.04	2.06	0	4.73	0.7	1.5	1.13	0	0.87	1.68	0	0	0	0	0	0	0.65	2.67	1.07	8.62	0	2.93	2.77	0	0	0	0	0	0	1.12
519.1	0	0	0.2	0.54	0	0	0	0	0.46	0	0	0	0	0	0	0.17	0	0.41	0	0	0	0.74	0	1.16	0.33	0.3	0	0	1.58	2.97	0	0	0	1.37	0	0.56	0	0	0	0	3.32	0	0	0	2.54	0	0	0	0
521.1	0	1.26	0	0	0	0	0	0.31	0	0	0	1.25	0	0.24	0	1.45	0	0.71	0	1.28	0	1.92	0	0	0	0	0	0	0	0	0	0	0	0	0	0	0	0	0	0	2.11	0	0	0	0	0.4	0	0	0
523.1	0	0.66	0	0	0	0	0	0	0	0	0	0	0	0.24	0	0.74	0	0.17	0	0	0.75	0.17	0	0	0	0	0	0	0	0	0	0	0	0	0	0	0	0	0	0	0	0	0	0	0	0.54	0	0	0
525.1	0	0	0	1.05	0	0	0	0	0	18.19	0	0	0	0	0	0	0	0	0	0	0	0	0	0.72	0.55	0.65	0	0	0	0	0	0	0	0	0	0	0	0	0	0	0	0	0	0	0	0	0	0	0
527.1	0	0	0	0	0	0	0	1.03	0	0	0	1.22	0	0	0	0	0	0	0	0.86	0	1.57	0	0.36	0	0.38	0	0	0	0	0	0	0	0	0	0	0	0	0	0	0	0.84	0	0	0	0	0	0	0
529.1	0	0.66	0	0.46	0	0	0	0.83	0	0	0	4	0	0	0	2.3	0	0	0	1.14	0	0	0	0	0	0	0	0	0	0	0	0	0	0	0	0	0	0	0	0	0	4.49	0	0.52	0	0	0	0.73	0
531.1	0	0.26	0	0.55	0	0	0	0.73	0	0	0	1.53	0	0	0	0.34	0	0.65	0	0	0	0.28	0	0	4.32	0	0	0	3.97	0	4.21	0	0	1.13	3.2	0	0	0.79	0	0	2.87	0	0	0.84	1.75	1.4	0	1.35	0
533.1	0.56	1.21	0	0.54	0	0.37	0	0	0	0	0	0	0	0	0	0.25	0	0	0	0	0	0	0	0.27	0	0	0	0	0	0	2.11	0	0	0	2.75	0	0	0	0	0	6.24	0	0	0	2.25	0	0	0	0
535.1	0	0.58	0	0.36	0	0.33	0.77	2.4	0	0	0	1.08	1.86	0.58	0	0.71	0	0.98	0	0.94	0	0	0	0	0	0	0	0	0	0	0	0	0	1.51	0	0	0	2.27	0	0	0	1.14	0	0	0	1.23	0	0	0
537.1	0	0.24	0	0	0	0	0	0	0	0	0	0.79	1.97	0	0	0.37	0	0	0	0.83	0	0.73	0	0	0	0	0	0	0	0	0	0	0	0	0	0	0	0	0	0	0	0.83	0	0	0	0	0	0	0
539.1	0	0	0	0	0	0	0	0	0	0	0	0.18	0	0	0	0	0	0	0	0	0	0	0	0	0	0	0	0	0	0	0	0	0	0	0	0	0	0	0	0	0	0	0	0	0	0	0	0	0
541.1	0	0	0	0.89	0	0	0.51	0	0	0	0	0	0	0	0	0	0	0	0	0	0	0.28	0	0	0	0	0	0	0	1.9	0	0	0	0	0	0	0	0	0	0	0	0	0	0	0	0	0	0	0
545.1	0.46	0.91	0.56	1.05	0.53	1.54	1.81	1.86	0	0	0.61	0.97	0	0	0	0	0	1.26	0	1.77	0	2.05	0	0	0	4.44	0	1.7	0	0	0	0	0	0	0	1.03	0	1.1	0	0.93	0	1.18	0	0	0	0	0	1	3.85
547.1	0.18	1.26	0	0.72	0	1.32	0.59	1.55	0	0	0	1.01	1.03	1.15	0	1.39	3.51	1.06	1.49	1.42	1.58	1.8	0	0.88	0	2.8	0	0.82	0	1.65	0	0	0	1.65	0	0.84	0	1.17	0	0.65	0	1.28	0	0	0	0.8	0	0.68	5.2
549.1	0	0	0	0	0	0	0	0	0	0	0	0.33	0	0	0	0.55	0	0	0	0.46	0	0	0	0.19	0	0	0	0	0	0	0	0	0	0	0	0	0	0	0	0	0	0	0	0	0	0	0	0	0
553.1	0	0.5	0	0.32	0	0	0	0	0	0	0	0	0	0	0	0	0	0	0	0	0	0	0	0	0	0	0	0	0	0	0	0	0	0	0	0	0	0	0	0	0	0	0	0	0	0	0	0	0
555.1	0	0.72	0	1.61	0	0	0	0	0	0	0	0	0	0	0	0	0	1.28	0	0.53	0	2.21	0	0.99	0	0	0	0	0	1.84	0	0	0	0	0	0	0	0	0	0	0	0	0	0	0	0	0	0	0
557.1	0	0	0	0.36	0	0	0	0	0	0	0	0	0	0	0	0	0	0	0	0	0	0	0	0.58	0	0	0	0.5	0	1.22	0	0	0	0	0	0	0	0	0	0	0	0	0	0	0	0	0	0	0
559.1	0	0.4	0	0	0	0.43	0	0	0	0	0	0	0	0	0	0	0	0	0	0	0	0	0	0	0	0	0	0	0	0	0	0	0	0	0	0	0	0	0	0	0	0	0	0	0	0	0	0	0
561.1	0	0	0.36	0.71	0	0.93	0	0	0	0	0	0.37	0.55	0	0	0.77	0	0.51	0	0	0	1	0	0.96	0	0	0	1.36	0	0	0	0	0	0.96	0	0	0	0	0	0	0	0	0	0	0	0	0	0.69	0
563.1	1.4	0	0.72	0	0	0	0	0	0	0	0	0	0	0	0	0	0	0.41	0	0	0	0	0	0	0	0	0	0	0	0	0	0	0	0	0	0	0	0	0	0	0	0	0	0	0	0	0	0	0
565.1	1.56	0.97	0.52	0	6.05	1.56	0.33	0	0	0	3.36	0	1.47	0.56	1.59	0	3.17	0	1.44	0	1.94	0	0	0.25	0	1.24	0	0.62	0	0	0	0	0	0	6.85	1.83	0	0.77	0	0	0	0	0	0	0	0	0	1.67	0
567.1	0	0.73	0	0.31	0	0	0	0	0	0	0	0	0	0.53	0	0	0	1.31	0	0	0	0.53	0	0	0	0	0	0.36	0	0	0	0	0	0	0	0	0	0.9	0	0	0	0	0	0	0	0	0	0	2.13
569.1	0	0.2	0	0.4	0	0	0	0	0	0	0	0	0	0	0	0	0	0	0	0	0	0.49	0	0	0	0	0	0	0	0	0	0	0	0	0	0	0	0	0	0	0	0	0	0	0	0	0	0	0
573.1	0	0	0	0	0.23	0	0	1.7	0	0	0	0	0	0	0	0	0	0	0	0	0	0	0	0	0	0	0	0	0	0	0	0	0	0	0	0	0	0.47	0	0	0	0	0	0	0	0	0	0	0
575.1	0	0	0	0.26	0.79	0.42	0	0	0.38	0	0	0	0	0	0	0	0	0	0	0	0	0	0	0	0	0	0	0	0	0	0	0	0	0	0	0	0	0	0	0	0	0	0	0	0	0	0	0	0
577.1	0	0.33	0	0	0	0	0	1.86	0	0	0	0.33	0	0.5	1.89	1.98	0	1.48	0	2.42	0	1.01	0	0	0	0	0	0	0	0	0	0	0	0	0	0	0	1.77	0	0	0	0.97	0	0	0	0	0	0	0
579.1	0	0	0	1.25	0	0	0	0	0	0	0	0	0	0	0	0	0	0	0	0	0	0	0	0	0	0	0	0	0	0	0	0	0	3.87	0	0	0	0	0	0	0	0	0	0	0	0	0	0	0
581.1	0	0	0	0	0	0	0	0	0	0	0	0.25	0	0	0	0	0	0	0	0	0	0	0	0	0	0.64	0	0	0	0	0	0	0	0	0	0	0	0	0	0	0	0	0	0	0	0	0	0	0
583.1	0.89	0.77	3.07	0	0	0	0	0	0	0	0	0.18	0	0.22	0	0.84	0	0	0	0	0	0.21	0	0.19	0	0.49	0	0.46	0	0	0	0.81	0	0	0	0.65	0	0	0	0	0	0	0	0	0	0	0	0	0
585.1	0	2.39	0	2.06	0	0.85	1.2	4	0	0	0	2.1	2.31	2.09	0	3.87	0.59	1.9	0	2.64	0.33	1.84	0	1	0	0.63	9.62	1.37	0	7.31	0	6.56	0	2.02	0	0	2.09	2.63	0	1.35	0	1.2	0	3.75	0	3.4	0	5.96	0
587.1	0	0	0.28	0.39	0	0	0	2.66	0	0	0	1.97	1.62	0.4	1.76	0.75	0.75	0.41	0	1.23	0	0.56	0	0	0	0	0	0	0	0.85	0	1.41	0	0.79	0	0	0	2.45	0	1.56	0	2.05	0	0.74	0	0.9	0	1.45	0
589.1	0	1.83	0.26	0	0	0	0	0.29	0	0	0	1.61	0	0.69	1.03	1.77	0	0	0	0.48	0	0.39	2.57	0	0	0	0	0	0	0	0	0.59	0	0.52	0	0	1.29	0.33	0	0	0	2.33	0	0	0	0.74	0	0	0
591.1	0.63	0	0	0	0	0	0.42	1.06	1.2	0	0.77	0.27	0	0	0	0	0	0	0	0.41	0	1.45	0	0	0	0	0	0	0	0	0	0	0	0	0	1.08	0	0	0	0	0	0	0	0	0	0	0	0	0
593.1	0	0	0	0	0	0	0	0	0	0	0	0	0	0.38	0	0.65	0	0	0	0	0	0	0	0	0	0	0	0	0	0	0	0	0	0	0	0	0	0	0	0	0	0	0	0	0	0	0	0	0
595.1	0	0	0	0	0	0	0	0	0	0	0	0	0	0	0	0.96	0	0	0	0	0	0	0	0	0	0.51	0	0	0	0	0	0	0	0	0	0	0	0	0	0	0	0	0	0	0	1.1	0	0	0
597.1	0	0	0	0	0	0	0	0	0	0	0	0	0	0	0	0.47	0	0	0	0	0	0	0	0	0	0.32	0	0	0	0	0	0	0	0	0	0	0	0	0	0	0	0	0	0	0	0.82	0	0	0
599.1	0	0	0	0.68	0	0	0	0	0	0	0	0.62	0.72	0	0	0.65	0	0	0	0	0	0.76	0	0.4	0	0	1.57	0	0	0	0	0	0	0	0	0	0	0	0	0	0	0	0	0	0	0	0	0	0
601.1	0	0	0	0	0	0	0	0	0	0	0	0	0	0	0	0	0	0	0	0	1.6	0.59	0	0	0	0	0	0	0	0	0	0	0	0	0	0	0	0	0	0	0	0	0	0	0	0	0	0	0
603.1	0	0	0	0	0	0	0	0	0	0	0	0	0	0	0	0	0	0	0	0	0	0	0	0	0.88	0	0	0	0	0	0	0	0	0	0	0	0	0	0	0	0	0	0	0	0	0	0	0	0
605.1	0	0	0	0	0	0	0	0	0	0	0	0	0	0	0	0	0	0	0	0	0	0	0	0	0	0	0	0	0	0	0	0	0	0	0	1	0	0	0	0	0	0	0	0	0	0	0	0	0
607.1	0	0.28	0	0	0.45	0	1.47	0.78	1.82	0	0	0.63	0	3.78	0	0	0	0.65	0	1.37	0	0.48	0	0	0	8.83	0	0	0	0	0	0	0	0	0	0.6	0	1.11	0	0	0	1.41	0	4.75	0	0	0	0.76	0
609.1	0	0.26	0	0	0	0	0.83	0.81	1.14	0	0	0.6	0.78	5.47	0	0	4.14	0.55	3.15	1.37	0	0.49	0	0	0	0	0	0	0	0	0	0	0	0	0	0.7	0	1.26	0	0	0	1.31	13.75	6.49	0	0.6	0	0	12.03
611.1	0	0.59	0	0	0	0	0	0	0	0	0	0	0	0	0	0	0	0	0	0	0	0	0	0	0	0	0	0	0	0	0	0	0	0	0	0	0	0	0	0	0	0	0	0	0	0	0	0	0
613.1	0	0	0	0	0	0	0	0	0	0	0	0	0	0	0	0	0	0	0	0	0	1	0	0	0	0	0	0	0	0	0	0	0	0	0	0	0	0	0	0	0	0	0	0	0	0	0	0	0
617.1	0	0.6	0	0	0	0	0	0	0	0	0	0	0	0.33	0	0.55	0	0	0	0	0	0.42	0	0	0	0	0	0	0	0	0	0	0	0	0	0	0	0	0	0	0	0	0	0	0	0	0	0	0
619.1	0	0	0	1.26	0	0	0	0	0	0	0	0	0	0	0	0	0	0	0	0	0	0	0	0	1.56	0	0	0	0	0	3.99	0	0	0	0	0	0	0	0	0	0	0	0	0	0	0	0	0	0
621.1	0	0	0	0	0	0	0	0	0	0	0	0	0	0	0	0	0	0	0	0	0	0	0	0.43	1.23	0	0	0	2.82	0	0	0	0	0	0	0	0	0	0	0	7.96	0	0	0	5.94	0	0	0	0
623.1	0	0	0	0	0	0	0	0	0	0	0	0	0	0	0	0	0	0	0	0	0	0	0	0.39	0	0	0	0	0	0	0	0	0	0	0	0	0	0	0	0	0	0	0	0	0	0	0	0	0
625.1	0.2	0	0	0	0	0	0	0	0	0	0	0	0	0	0	0	0	0	0	0	0	0	0	0.33	0	0	0	0	0	0	0	0	0	0	0	0	0	0	0	0	0	0	0	0	0	0	0	0	0
627.1	0.29	2.61	0.31	0	0.82	4.66	1.43	0	4.46	0	5.16	0	0	0.62	0	1.78	0	2.58	0	0	0	0.44	0	0.7	0	5.02	0	3.03	0	0	0	0	0	0	0	2.36	0	0	0	0	0	0	0	0	0	0	0	0	4.5
629.1	0	0.27	0	0	0.42	0	0.67	0	2.45	0	3.06	1.17	1.46	0	1.94	0	0.79	0	0	0.67	0.62	1.22	0	0	0	0	0	0	0	0	0	0	0	0	0	0	0	0	0	0	0	1.19	0	0	0	0	0	0	0
631.1	0	0	0	0	0	0	0.53	0	0	0	0	0	0.64	0	1.56	0	0	0	3.5	0	0.73	0.31	0	0	0	0	0	0	0	0	0	0	0	0	0	0	0	0	0	0	0	0	0	0	0	0	0	0	0
633.1	0	0	0	0	0	0	0.28	0	0	0	0	0	0	0	0	0	0	0	0	0	0	0	0	0	0	0	0	0	0	0	0	0	0	0	0	0	0	0	0	0	0	0	0	0	0	0	0	0	0
635.1	0	1.14	0	0	0	0	0.67	0	0	0	0	0	0	0	0	0	0	0	3.42	0	0	0	0	0	0	0	0	0	0	0	0	0	0	0	0	0	0	0	0	0	0	0	0	0	0	0	0	0	0
637.1	0	0	0	0	0	0	0	0	0	0	0.67	0	0	0	0	0	0	0	0	0	0	0	0	0	0	0	0	0	0	0	0	0	0	0	0	0	0	0	0	0	0	0	0	0	0	0	0	0	0
639.1	0	0	0	0	0	0	0	0	0	0	1.26	0	0	0	0	0	0	0	0	0	0	0	0	0	0	0	0	0	0	0	0	0	0	0	0	0	0	0	0	0	0	0	0	0	0	0	0	0	0
641.1	0	0	0	0	0	0	0	0	0	0	0	1.77	0	0.71	2.36	1.85	0	1.19	1.11	1.95	2.78	1.89	0	2.15	0	0	0	0	0	0	0	0	0	0	0	0	5.31	0	0	0	0	0	0	0	0	1.14	0	0	0
643.1	0	0	0	0	0	0	0	0	0	0	0	0	0	0	2.31	0	0	0	0	0	2.05	0	0	0	0	0	0	0	0	0	0	0	0	0	0	0	0	0	0	0	0	0	0	0	0	0	0	0	0
645.1	0	0	0.32	0	0	0	0	0	0	0	0	0	0	0	0	0	0	0	0	0	0	0	0	0	0	0	0	0	0	0	0	0	0	0	0	0	0	0	0	0	0	0	0	0	0	0	0	0	0
647.1	0	0	0	0	0	0	0	0	0	0	0	0	0	0	0	0	0	0	0	0	0	0	0	0	0	0	0	0	0	0	0	0	0	0	0	0	0	0	0	0	0	0	0	0	0	0	0	0	0
649.1	0	0	0	0	0	0	0	0	0	0	0	0	0	0	0	0	0	0	0	0	0	0	0	0	0	0	0	0	0	0	0	0	0	0	0	0	0	0	0	0	0	0	0	0	0	0	0	0	0
651.1	0	1.54	0	0	0	0	0	0.66	0	0	0	1.2	3.39	0	0	0	3.03	0	2.06	0.46	1.05	0	4.88	0.65	0	0	0	0	0	0	0	1.81	0	1.02	0	0	0	0.55	0	0.95	0	0	0	0	0	0	0	0.69	0
653.1	0	0	0.65	0	0	0	0	1.24	0	0	0	2.07	2.62	2.02	3.57	2.6	2.88	0	3.3	0.9	1.79	0	7.06	0	0	0.81	0	0	0	0	2.89	2.19	4.02	0.95	3.47	1.03	5.63	1.06	0	1.71	4.26	3.09	0	3.28	6.17	8.46	0	1	0
657.1	0	0	0	0	0	0	0	0	0	0	0	0	0.47	0	0	0	0	0	0	0	2.54	0	0	0	0	0	0	0.95	0	0	0	0	4.75	0	0	0	0	0	0	0	0	0	0	0	0	0	0	0	0
659.1	0	0	0	0	0	0.54	0	0	0	0	0	0	0	0	0	0	0	0	0	0	0	0	0	0	0	0	0	0.5	0	0	0	2.9	0	0	0	1.38	0	0	0	0	0	0	0	1.02	0	0	0	0	0
663.1	0	0	0	0	0	0	0	0	0	0	0	0	0	0	0	0	0	0	0	0	0	0	0	0	0	0	0	0	0	0	0	0	0	0	0	0	0	0	0	0	0	0	0	0	0	1.51	0	0	0
665.1	0	0	0	0	0	0	0	0	0	0	0	0	0	0	0	0	0	0	0	0	0.77	0	0	0	0	0	0	0	0	0	0	0	0	0	0	0	0	0	0	0	0	0	0	0	0	0	0	0	0
667.1	0	0	0	0	0	0	0	0	0	0	0	0	0	0	0	0	0	0	0	0	0	0	0	0	0	0	0	0	0	0	0	0	0	0	0	0.53	0	0	0	0	0	0	0	0	0	0	0	0	0
669.1	0	0	0	0	0	0	0	0	0	0	0	0	0	0	0	0	0	0	0	0	0	0	0	0	0	0	0	0	0	0	0	0	0	0	0	0.77	0	0	0	0	0	0	0	0	0	0	0	0	0
677.1	0	0	0	0	0	0	0	1.24	0	0	0	0	1.61	0	0	0	0	0	0	0	0	0	0	0	0	0	0	0	0	0	0	0	0	0	0	0	0	0	0	0	0	0	0	0	0	0	0	0	0
679.1	0	0	0	0	0	0	0	0	0	0	0	0.91	1.37	0	0	0	0	0	0	0	0	0	0	0	0	0	0	0	0	0	0	0	0	0	0	0	0	0	0	0	0	0	0	0	0	0	0	0	0
681.1	0.64	0	0.8	0	0	0	0	0	0	0	0	0	0	0	0	0	0	0	0	0	0	0	0	0	1.25	0	0	0	0	0	0	0	0	0	0	0	0	0	0	0	0	0	0	0	0	0	0	0	0
683.1	0.4	0	0	0	0	0	0	0	0	0	0	0	0	0	0	0	0	0	0	0	0	0	0	0	0	0	0	0	0	0	0	0	0	0	0	0	0	0	0	0	0	0	0	0	0	0	0	0	0
685.1	0.45	1.58	0	0.46	1.17	0	0	0	0	0	0	0.9	0	0	0	0.61	0	1.74	0	1.05	0	0	0	0	0	0	5.37	5.4	0	0	0	5.77	0	1.41	0	5	0	3.2	0	0	0	0	0	0	0	3.24	0	5.1	0
687.1	0.9	2.03	0	0	0.86	8.95	1.39	4.62	1.11	0	0.48	2.39	2.9	10.41	7.27	0.72	5.71	4.8	4.75	1.86	4.73	0.56	7.22	0	1.21	12.68	4.98	6.68	0	0	0	10.28	0	1.44	7.48	10.89	0	7.17	11.68	32.11	0	8.66	0	22	7.24	7.87	0	11.2	12.99
689.1	0	0	0	0	0	0	0	0	0	0	0	0	0	0	0	0	0	0	0	0	0	0	0	0	0	0	0	0	0	0	0	0	0	0	0	0	0	0	0	0	0	0	0	0	0	0	0	0	0
691.1	0	0	0	0	0	0	0	0	0	0	0	0	0	0	0	0	0	0	0	0	0	0	0	0	0	0	0	0	0	0	0	0	0	0	0	0	0	0	0	0	0	0	0	0	0	0	0	0	0
693.1	0	0	0	0	0	0	0	0	0	0	0	1	0	0	0	0	0	0	0	0	0	0	0	0	0	0.74	0	0.67	0	0	0	0	0	0	0	0	0	0	0	0	0	0	0	0	0	0	0	0	0
695.1	0	1.19	0	0	0	0.63	0	0	0	0	0	0.54	0	2.43	0	0	1.32	0	0	0	1.74	0	0	0	0	0.49	9.03	1.14	0	0	0	6.53	0	1.2	0	0	0	0	0	4.81	0	2.12	0	5.32	0	3.02	0	1.22	0
697.1	0	0.79	0	0	0	0.45	0	0	0	0	0	0	0	0.82	0	0	0	0	0	0	2.27	0	0	0	0	0	0	0	0	0	0	6.49	0	1.25	0	0	0	0	0	4.64	0	0	0	2.91	0	1.3	0	0.75	0
699.1	0	0	0	0	0	0	0	0	0	0	1.12	0	0	0	0	0	0	0	0	0	0	0	0	0	0	0	0	0	0	0	0	0	0	0	0	0	0	0	0	0	0	0	0	0	0	0	0	0	0
701.1	0	0	0	0	0	0	0	0	0	0	0	0	0	0	0	0	0	0	0	0	0	0	0	0	0	0	0	0	0	0	0	0	0	0	0	0	0	0	0	0	0	0	0	0	0	0	0	0	0
703.1	0	0	0	0	0	0	0	0	0	0	0	0	0	0	0	0	0	1.28	0	0	0	1.69	0	0	0	0	0	0	0	0	0	0	0	0.91	0	0	0	0	0	0	0	0	0	0	0	0	0	0	0
707.1	0	0.3	0	0	0	0	0	0	0	0	0	0	0	0	0	0	0	0	0	0	0	0	0	0	0	0	0	0	0	0	0	0	0	0	0	0	0	0	0	0	0	0	0	0	0	0	0	0	0
709.1	0	0	0	0	0	0	0	0	0	0	0	0	0	0	0	0	0	0	0	0	0	0	0	0	1.85	0	0	0	0	0	0	0	0	0	0	0	0	0	0	0	0	0	0	0	0	0	0	0	0
711.1	0	0	0	0	0	0	0	0	0	0	0	0	0	0	0	0	0	0	0	0	0	0	0	0	0	0	0	0	2.31	0	6.26	0	6.78	0	5.81	0	0	0	14.94	0	13.55	0	0	0	8.26	0	47.5	0	0
715.1	0	0	0	0	0	0	0	0	0	0	0	0	0	0	0	0	0	0	0	0	0	0.74	0	0	0	0	0	0	0	0	0	0	0	0	0	0	0	0	0	0	0	0	0	0	0	0	0	0	0
719.1	0	0	0	0	0	0	0	0	0	0	0	0	0	0	0	0	0	0	0	0	0	0	0	0	0	0	0	0	0	0	0	0	2.77	0	0	0	0	0	0	0	0	0	0	0	0	0	0	0	0
729.1	0	0	0	0	0	0	0	0	0	0	0	0	0	0	0	0	0	0	0	0	0	0	0	0.43	0	0	0	0	0	0	0	0	0	0	0	0	0	0	0	0	0	0	0	0	0	0	0	0	0
733.1	0	0	0	0	0	0.6	0	0	0	0	0	0	1.17	0	0	0	0	0	0	0	0	0	0	0	0	0	0	0	0	0	0	0	0	0	0	0	0	0	0	0	0	0	0	0	0	0	0	0	0
737.1	0	0	0	0	0	0	0	0	0	0	0	0	2.54	0	0	0	0	0	0	0	0	0.59	0	0	0	0	0	0	0	0	0	0	0	0	0	0	0	0	0	0	0	0	0	0	0	0	0	0	0
739.1	0	0	0	0	0	0	0	0	0	0	0	0	0	0	0	0	0	0	0	0	0.94	0	0	0	0	0	0	0	0	0	0	0	0	0	0	0	0	0	0	0	0	0	0	0	0	0	0	0	0
743.1	0	0	0.56	0	0	0	0	0	0	0	0	0	0	0	0	0	0	0	0	0	0	0	0	0	0	0	0	0	0	0	0	0	0	0	0	0	0	0	0	0	0	0	0	0	0	0	0	0	0
745.1	1.37	0	0	0	0	0	0	0	0	0	0	0	0	0	0	0	0	0	0	0	0	0	0	0	0	0	0	0	0	0	0	0	0	0	0	0	0	0	0	0	0	0	0	0	0	0	0	0	0
751.1	0	0	0	0	0	0	0	0	0	0	0	0	0	0	0	0	0	0	0	0	0	0	0	0	0	0.63	6.22	0	0	0	0	0	0	0	0	0	0	0	0	0	0	0	0	0	0	0	0	0	4.12
753.1	3.64	2.36	0	0	0	0	0	2.45	0	0	0	1.67	3.71	0.84	7.19	2.52	5.09	1.58	5.04	2.32	4.83	2.5	12.9	1.34	0	0	0	0	0	0	0	0	0	0	0	0	4.49	1.86	0	0	0	1.16	0	0	0	0	0	0	0
755.1	0	0	0	0	0	0	0	0	2.5	0	0	0	0	0	0	0	0	0	0	0	0	0	0	0	0	0	0	0	0	0	0	0	0	4.1	0	0	0	0	0	0	0	0	0	0	0	0	0	0	0
759.1	0	0	0	0	0	0	0.41	0	0	0	0	0	0	0	0	0	2.51	0	0	0	1.1	0	0	0.46	1.33	0	0	0	0	0	3.27	0	3.53	0	2.96	0	0	0	5.72	0	5.47	0	0	0	0	0.81	0	0	0
761.1	0	0	0	0	0	0	1.39	0	0	0	2.39	0	0	0	0	0	0	0	0	0	0	0	0	0	0	0	0	0	0	0	0	0	0	0	0	0	0	0	0	0	0	0	0	0	0	0	0	0	0
763.1	0	0	0	0	0	0	0	0	0	0	0	0	0	0	0	0	0	0	0	0	0	0	0	0	0	0	0	0	0	0	0	0	0	0.8	0	0	0	0	0	0	0	0	0	0	0	0	0	0	0
765.1	0	0	0	0	0	0	0	0	0	0	1.02	1.04	0	0	0	0	0	0	0	1.03	0	0	0	0	0	0	0	0	0	0	0	0	0	0	0	0	0	0	0	0	0	0	0	0	0	0	0	0	2.1
767.1	0	0.67	0	0	0	0	0	0	0	0	0	0	5.95	0	6.45	0	5.16	0	4.24	0	4.34	0	11.34	0	0	0	0	0	0	0	0	0	0	0	0	0	5.33	0	0	0	0	0	16.66	0	0	0	0	0	0
769.1	0	0	0	0	0	0	0	0	0	0	0	0	0	0.88	0	0	0	0	0	0	0	0	0	0	0	0.61	4.3	0	0	0	0	0	0	0	0	0	0	0	0	0	0	0	0	0	0	0	0	2.19	0
771.1	0	0	0	0	0	0	0.68	0	0	0	0	0	0	0	0	0	0	0.81	0	0.96	0	0.83	0	0	0	0	0	0	0	0	0	0	0	0	0	0	0	0.95	0	1.41	0	0	0	0	0	0	0	0	1.23
777.1	0	0	0	0	0	0	0	0	0	0	0	0	0	0	0	0	0	0	0	0	0	0	0	0	0	0	0	0	0	0	0	0	0	0	0	0	0	0	0	0	0	0	0	0	0	0	0	0	0
781.1	0	0	0	0	0	0	0	0	0	0	0	0	0	0	0	0	0	0	0	0	0	0	0	0	0	0	0	0	0	0	0	0	0	0	0	0	0	0	0	0	0	0	0	0	0	0	0	0	0
783.1	0	0	0	1.31	0	0	0	0	0	0	0	0	0	0	0	0	0	0	0	0	0	0	0	0	0	0	0	0	0	0	0	0	0	0	0	0	0	0	0	0	0	0	0	0	0	0	0	0	0
785.1	0	0	0	0	0	0	0	0	0	0	0	0	0	0	0	0	0	0	0	0	0	0	0	0.61	0	0	0	0	0	3.25	0	0	0	0	0	0	0	0	0	0	0	0	0	0	0	0	0	0	0
787.1	0	0	0	0	0	0	0	0	0	0	0	0	0	0	0	6.89	0	0	0	0	0	1.29	0	0	0	0	0	0	0	0	0	0	0	0	0	0	0	0	0	0	0	0	0	0	0	0	0	0	0
789.1	0	0	0	0	0	0	0	0	0	0	0	0	0	0.43	0	0	0	0.49	0	0	0.99	0	0	0.59	0	0	0	0	0	0	0	0	0	0	0	0	0	0	0	0	0	0	0	0	0	3.15	0	0	0
791.1	0	0	0	1.56	0	0	0	0	0	0	0	0	0	0	0	0	0	0	0	0	0	0	0	0	0	0	0	0	0	0	0	0	0	0	0	0	0	0	0	0	0	0	0	0	0	1.07	0	0	0
793.1	0	0	0	0	0	0	0	0	0	0	0	0	0	0	0	0	0	0	0	0	1.25	0	0	0	0	0	0	0	0	0	0	0	0	0	0	0	0	0	0	0	0	0	0	0	0	0	0	0	0
801.1	0	0	0	0	0	0	0	0	0	0	0	0	2.43	0	2.89	0	0	0	4.47	0	2.18	0	0	0	0	0	0	0	0	0	0	0	0	0	0	0	0	0	0	0	0	0	0	0	0	0	0	0	1.61
803.1	0	0	0	0	0	0	0	0	0	0	0	0	0	0	0	0	2.11	0	0	0	0	0	0	0	0	0	0	0	0	0	0	0	0	0	0	0	0	0	0	0	0	0	0	0	0	0	0	0	0
807.1	0	2.36	0	0	0	0	0	0	0	0	0	0.57	0.62	1.93	0	0.52	0	0	0	0	1.79	1.13	0	0	0	0	0	0	0	0	0	1.64	0	0	0	0	0	0	0	0	0	1.18	0	0	0	0	0	0	0
809.1	0	0	0	0	0	0	0	0	0	0	0	0	0	0	0	0	0	0	2.31	0	0	0	0	0	0	0	0	0	0	0	0	0	0	0	0	0	0	0	0	0	0	0	0	0	0	0	0	0	0
811.1	0	0	0	0	0	0	0	0	0	0	0	0	0	0	0	0	0	0	0	0	0	0	0	0	0	0	3.49	0	0	0	0	0	0	0	0	0	0	0	0	0	0	0	0	0	0	0	0	0	0
813.1	0	0	0	0	0	0	0	0	0	0	0	0	0	0	0	0	0	0	0	0	0	0	0	0	0	0	0	0	0	0	0	0	0	0	0	0	0	0	0	0	0	0	0	0	0	0	0	0	2.55
815.1	0	0	0	0	0	0	0	0	0	0	1.16	0	0	0	0	0	0	0	0	0	0	0	0	0	0	0	0	0	0	0	0	0	0	0	0	0	0	0	0	0	0	0	0	0	0	0	0	0	0
817.1	0	1.72	0	0	0	0	0	0	0	0	0	0	0	1.04	0	0	0	0	0	0	0	0	0	0	0	0	0	0	0	0	0	0	0	0	0	0	0	0	0	0	0	0	0	0	0	0	0	0	0
821.1	0	0.68	0	0	0	0	0	0	0	0	0	0	0	0	0	0	0	0	0	0	0	0	0	0	0	0	0	0	0	0	0	0	0	0	0	0	0	0	0	0	0	0	0	0	0	0	0	0	0
823.1	0	0	0	0	0	0	0	0	0	0	0	0	1.23	0	0	0	1.84	0	0	0	1.76	0	0	0	0	0	0	0	0	0	0	0	0	0	0	0	0	0	0	0	0	0	0	0	0	0	0	0	0
829.1	0	0	0	0	0	0	0	0	0	0	0	0	0	0	0	0	0	0	0	0	0	0	0	0	0	0	0	0	0	0	0	0	0	0	0	0	0	0	0	0	0	0	0	0	0	0	0	0	0
833.1	0	0	0	0	0	0	0	0	0	0	0	0	1.08	0	0	0	0	0	3.05	0	1.71	0	0	0.68	0	0	0	0	0	0	0	0	0	0.83	0	0	0	0	0	0	0	0	0	0	0	0	0	0	0
867.1	0	0	0	0	0	0	0	0	0	0	0	0	0	0	0	0	0	0	0	0	0	0	0	0	0	0	0	0	0	0	0	0	0	0	0	0	0	0	0	0	0	0	0	0	0	0	0	0	0
871.1	0	0	0	0	0	0	0	0	0	0	0	0	0	1.4	0	0	0	0.6	0	0.71	0	0	0	0	0	0.5	0	0	0	0	0	0	0	0	0	0	0	0	0	0	0	0	0	0	0	0	0	0	2.05
875.1	0	0	0	0	0	0	0	0	0	0	0	0	0	0	0	0	0	0	1.72	0	0	0	0	0	0	0	0	0	0	0	0	0	0	0	0	0	0	0	0	0	0	0	0	0	0	0	0	0	0
879.1	0	0.67	0	0	0	0	0	0	0	0	0	0	0	0.52	0	0	0	0	0	0	0	0	0	0	0	0	0	0	0	0	0	0	0	0	0	0	0	0	0	0	0	0	0	0	0	0	0	0	0
905.1	0	0	0	0	0	0	0	0	0	0	0	0	0	0	0	0	0	0	0	0	0	0	0	0	0	0	0	0	0	0	0	0	0	0	0	0	0	0	0	0	0	0	0	0	0	0	0	0	0
909.1	0	0	0	1.17	0	0	0	0	0	0	0	0	0	0	0	0	0	0	0	0	0	0	0	0	0	0	0	0	0	0	0	0	0	0	0	0	0	0	0	0	0	0	0	0	0	0	0	0	0
911.1	0	1.19	0	0	0	0	0	0	0	0	0	0	0	0.69	0	1.08	0	0	0	0	0	1.09	0	0.69	0	0	0	0	0	0	0	0	0	0	0	0	0	0	0	0	0	0	0	0	0	0	0	0	0
925.1	0	0	0	2.74	0	0	0	0	0	0	0	0	0	0	0	1.91	0	0	0	0	0	0	0	0	0	0	0	0	0	0	0	0	0	0	0	0	0	0	0	0	0	0	0	0	0	1.93	0	0	0
927.1	0	0	0	0	0	0	0	0	0	0	0	0	0	0	0	0	0	0	0	0	0	0	0	0.87	0	0	0	0	0	0	0	0	0	0	0	0	0	0	0	0	0	0	0	0	0	0	0	0	0
929.1	0	0	0	0	0	0	0	0	0	0	0	0	0	0.57	0	0	0	0	0	0	0	0	0	0	0	0	0	0	0	0	0	0	0	0	0	0	0	0	0	0	0	0	0	0	0	0	0	0	0
935.1	0	0	0	0	0	0	0	0	0	0	0	0	0	0	0	0	0	0	0	0	0	0	0	0	0	0	0	0	0	0	0	0	0	0	0	0	0	0	0	0	0	0	0	0	0	0	0	0	0
965.1	0	0	0	0	0	0	0	0	0	0	0	0	0	0	0	0	0	0	0	0	0	0.94	0	0	0	0	0	0	0	0	0	0	0	0	0	0	0	0	0	0	0	0	0	0	0	0	0	0	0
967.1	0	0.84	0	0	0	0	0	0	0	0	0	0	0	0.36	0	0	0	0	0	0	0	0	0	0	0	0	0	0	0	0	0	0	0	0	0	0	0	0	0	0	0	0	0	0	0	0	0	0	0
969.1	0	0	0	0	0	0	0	0	0	0	0	0	0	0	0	0	0	0	0	0	0	0	0	0	0	0	0	0	0	0	0	0	0	0	0	0	0	0	0	0	0	0	0	0	0	0	0	0	0
971.1	0	0	0	0	0	0	0	0	0	0	0	0	0	0	0	0	0	0	0	0	0	0	0	0	0	0	0	0	0	0	0	0	0	0	0	0	0	0	0	0	0	0	0	0	0	0	0	0	0
973.1	0	0	0	0	0	0	0	0	0	0	0	0	0	0	0	0	0	0	0	0	0	0	0	0	0	0	0	0	0	0	0	0	0	0	0	0	0	0	0	0	0	0	0	0	0	0	0	0	0
Label	MTT1 A01	MTT2 A01	MTT1 A02	MTT2 A02	MTT1 A03	MTT2 A03	MTT1 A04	MTT2 A04	MTT1 A05	MTT2 A05	MTT1 A06	MTT2 A06	MTT1 A08	MTT2 A07	MTT1 A08	MTT2 A08	MTT1 A09	MTT2 A09	MTT1 A10	MTT2 A10	MTT1 A11	MTT2 A11	MTT1 A12	MTT2 A12	MTT1 B01	MTT2 B01	MTT1 B02	MTT2 B02	MTT1 B03	MTT2 B03	MTT1 B04	MTT2 B04	MTT1 B05	MTT2 B05	MTT1 B06	MTT2 B06	MTT1 B07	MTT2 B07	MTT1 B08	MTT2 08	MTT1 B09	MTT2 B09	MTT1 B10	MTT2 B10	MTT1 B11	MTT2 B11	MTT1 B12	MTT2 B12	MTT1 C01
Plot	6	4	6	5	6	6	6	12	6	14	6	15	12	21	12	23	12	32	12	37	12	40	12	41	27	42	27	27	27	28	27	4	27	5	27	6	15	12	15	14	15	15	15	21	15	23	15	32	42
Depth	0-7.5	0-7.5	0-7.5	0-7.5	0-7.5	0-7.5	0-7.5	0-7.5	0-7.5	0-7.5	0-7.5	0-7.5	0-7.5	0-7.5	0-7.5	0-7.5	0-7.5	0-7.5	0-7.5	0-7.5	0-7.5	0-7.5	0-7.5	0-7.5	0-7.5	0-7.5	0-7.5	0-7.5	0-7.5	0-7.5	0-7.5	7.5-15	0-7.5	7.5-15	0-7.5	7.5-15	0-7.5	7.5-15	0-7.5	7.5-15	0-7.5	7.5-15	0-7.5	7.5-15	0-7.5	7.5-15	0-7.5	7.5-15	0-7.5
Treatment	PF	Mm	PF	PP	PF	PF	PF	Ii	PF	Nn	PF	Ii	Ii	Nn	Ii	Mm	Ii	Nn	Ii	Ii	Ii	Mm	Ii	PP	PF	PF	PF	PF	PF	PP	PF	Mm	PF	PP	PF	PF	Ii	Ii	Ii	Nn	Ii	Ii	Ii	Nn	Ii	Mm	Ii	Nn	PF
Block	1	1	1	1	1	1	1	1	1	1	1	2	1	2	1	2	1	3	1	3	1	3	1	3	2	3	2	2	2	2	2	1	2	1	2	1	2	1	2	1	2	2	2	2	2	2	2	3	3
Spatial	H	V	H	V	H	V	H	V	H	V	H	V	H	V	H	V	H	V	H	V	H	V	H	V	H	V	H	V	H	V	H	V	H	V	H	V	H	V	H	V	H	V	H	V	H	V	H	V	H
PseudoRep	1		2		3		4		5		6		1		2		3		4		5		6		1		2		3		4		5		6		1		2		3		4		5		6		1
[truncated: 99 more columns]
